# Supplementary material for: Does attendance at a specialist antenatal clinic improve clinical outcomes in women with class III obesity compared with standard care? A retrospective case-note analysis
Source: PubMed Central journal article supplement (PMC5730005; doi:10.1136/bmjopen-2016-015218), 2017-06-21
Supplement: bmjopen-2016-015218.draft_revisions.pdf [file bmjopen-2016-015218.draft_revisions.pdf]

# BMJ Open

**Attendance at a specialised antenatal clinic for obesity is associated with reduced rates of stillbirth and low birthweight and improved detection of gestational diabetes: a retrospective case-note analysis.**

|                                 |                                                                                                                                                                                                                                                                                                                                                                                                                           |
|---------------------------------|---------------------------------------------------------------------------------------------------------------------------------------------------------------------------------------------------------------------------------------------------------------------------------------------------------------------------------------------------------------------------------------------------------------------------|
| Journal:                        | <i>BMJ Open</i>                                                                                                                                                                                                                                                                                                                                                                                                           |
| Manuscript ID                   | bmjopen-2016-015218                                                                                                                                                                                                                                                                                                                                                                                                       |
| Article Type:                   | Research                                                                                                                                                                                                                                                                                                                                                                                                                  |
| Date Submitted by the Author:   | 16-Nov-2016                                                                                                                                                                                                                                                                                                                                                                                                               |
| Complete List of Authors:       | Denison, Fiona; The University of Edinburgh , MRC Centre for Reproductive Health<br>MacGregor, Heather; University of Edinburgh Queen's Medical Research Institute<br>Stirrat, Laura; University of Edinburgh Queen's Medical Research Institute<br>Stevenson, Kerrie; University of Edinburgh Queen's Medical Research Institute<br>Norman, Jane; University of Edinburgh<br>Reynolds, Rebecca; University of Edinburgh, |
| <b>Primary Subject Heading</b>: | Obstetrics and gynaecology                                                                                                                                                                                                                                                                                                                                                                                                |
| Secondary Subject Heading:      | Health services research                                                                                                                                                                                                                                                                                                                                                                                                  |
| Keywords:                       | Obesity, Stillbirth, low birthweight                                                                                                                                                                                                                                                                                                                                                                                      |
|                                 |                                                                                                                                                                                                                                                                                                                                                                                                                           |

SCHOLARONE™  
Manuscripts

only

Specialist clinic improves outcomes in maternal obesity

Attendance at a specialised antenatal clinic for obesity is associated with reduced rates of stillbirth and low birthweight and improved detection of gestational diabetes: a retrospective case-note analysis.

Denison FC\*, MacGregor H, Stirrat LI, Stevenson, KJ, Norman JE, Reynolds RM

Denison FC: Reader and Honorary Consultant in Maternal and Fetal Health, Tommy's Centre for Maternal and Fetal Health, University of Edinburgh MRC Centre for Reproductive Health, Queen's Medical Research Institute, 47 Little France Crescent, Edinburgh, EH16 4TY

MacGregor H: Medical Student, University of Edinburgh

Stirrat LI: Clinical Research Fellow, Tommy's Centre for Maternal and Fetal Health, University of Edinburgh MRC Centre for Reproductive Health, Queen's Medical Research Institute, 47 Little France Crescent, Edinburgh, EH16 4TY

Stevenson, KJ: Medical Student, University of Edinburgh

Norman JE: Professor of Maternal and Fetal Health, Tommy's Centre for Maternal and Fetal Health, University of Edinburgh MRC Centre for Reproductive Health, Queen's Medical Research Institute, 47 Little France Crescent, Edinburgh, EH16 4TY

Reynolds RM: Professor of Metabolic Medicine, British Heart Foundation Centre for Cardiovascular Science, Queen's Medical Research Institute, 47 Little France Crescent, Edinburgh, EH16 4TY

Corresponding author:

Dr Fiona Denison

Tommy's Centre for Maternal and Fetal Health

1 28 Specialist clinic improves outcomes in maternal obesity  
2 MRC Centre for Reproductive Health

3 29 Queen's Medical Research Institute

4  
5 30 Edinburgh

6  
7 31 0131 242 6449

8  
9  
10 32 [Fiona.Denison@ed.ac.uk](mailto:Fiona.Denison@ed.ac.uk)

11  
12 33

13  
14  
15  
16  
17  
18  
19  
20  
21  
22  
23  
24  
25  
26  
27  
28  
29  
30  
31  
32  
33  
34  
35  
36  
37  
38  
39  
40  
41  
42  
43  
44  
45  
46  
47  
48  
49  
50  
51  
52  
53  
54  
55  
56  
57  
58  
59  
60

For peer review only

Specialist clinic improves outcomes in maternal obesity

Abstract

35

Objectives: To determine whether attendance at a specialised multidisciplinary antenatal clinic for women with Class III obesity ( $BMI > 40 \text{ kg/m}^2$ ) is associated with improved clinical outcomes compared to women receiving standard antenatal care

Design: Retrospective cohort study using routinely collected data from electronic patient record (TRAK)

Setting: Community or hospital based antenatal care

Participants: Women with a singleton pregnancy with Class III obesity who booked for antenatal care and delivered in one of two hospitals in NHS Lothian, Scotland, UK between 2008 – 2014. Maternal and offspring outcomes were compared in women who attended a specialised obesity clinic (attenders;  $n=511$ ) compared to those who received standard antenatal care (non-attenders;  $n=502$ ).

Main Outcome Measures: Outcomes including stillbirth, low birthweight, gestational diabetes, induction of labour and caesarean section.

Results: Compared to non-attenders, attenders were less likely to have a stillbirth (Odds Ratio (OR), 95% Confidence Interval (CI) 0.12, 0.06-0.97) and a low birthweight baby (OR, 95% CI 0.57, 0.33-0.99) and more likely to be screened for (100% vs 73.6%;  $p < 0.001$ ) and diagnosed with (26.0% vs 12.5%;  $p < 0.001$ ) gestational diabetes, to require induction of labour (38.4% vs 29.9%,  $p = 0.009$ ), an elective (20.3% vs 17.7%;  $p < 0.001$ ) and emergency (23.9% vs 20.3%;  $p < 0.001$ ) caesarean section and attend antenatal triage one or more times during pregnancy (77.7% vs 53.1%;  $p < 0.001$ ). Attenders had a higher BMI (44.5% vs 43.2%;  $p < 0.001$ ) and were more likely to be nulliparous (46.0% vs 24.9%;  $p < 0.001$ ). There were no other differences in maternal demographic or maternal and offspring outcomes between attenders and non-attenders.

1 Specialist clinic improves outcomes in maternal obesity  
2 61

3 62 Conclusions: Attendance at a specialised antenatal clinic for obesity is associated with reduced rates of  
4  
5 63 stillbirth and low birthweight and improved detection of gestational diabetes. The improvement in clinical  
6  
7 64 outcomes is associated with an increase in healthcare attendance to obstetric triage and clinical  
8  
9 65 interventions including induction of labour and caesarean section.  
10  
11 66

12  
13  
14 67 Keywords

15  
16 68 Obesity, stillbirth, low birthweight  
17  
18 69

19  
20  
21  
22  
23  
24  
25  
26  
27  
28  
29  
30  
31  
32  
33  
34  
35  
36  
37  
38  
39  
40  
41  
42  
43  
44  
45  
46  
47  
48  
49  
50  
51  
52  
53  
54  
55  
56  
57  
58  
59  
60

For peer review only

Specialist clinic improves outcomes in maternal obesity

1 70

2 71 Article Summary - Strengths and limitations of this study

3 72

4

5 73

• This study compares maternal and offspring outcomes in women with Class III obesity who attend a specialist obesity antenatal clinic compared to those who do not.

8 74

9

10 75

• A strength of our study is that we were able to compare important clinical outcomes in women and offspring such as stillbirth and low birthweight.

12 76

13

14 77

• The use of routinely collected clinical data means that our results are relevant to clinical practice in which multiple different care pathways exist.

17 78

18

19 79

• The stillbirth findings and causality need to be interpreted with caution due to the small sample size and attenuation of findings in adjusted analyses.

22 80

23

24 81

• As a retrospective cohort study using routinely collected data from electronic patient record, results must be interpreted with caution because of potential bias from confounding.

26 82

27

28 83

29

30 84

31

32 85

33

34

35

36

37

38

39

40

41

42

43

44

45

46

47

48

49

50

51

52

53

54

55

56

57

58

59

60

Specialist clinic improves outcomes in maternal obesity

86 **Introduction**

87 Maternal obesity is the most common co-morbidity of pregnancy. In the UK, approximately 20% of  
88 pregnant women are obese and 2% have very severe obesity (Class III obesity, body mass index BMI  $\geq$   
89 40 kg/m<sup>2</sup>) [1]. Maternal obesity is associated with increased risks for adverse maternal and offspring  
90 health including gestational diabetes mellitus (GDM), thromboembolic and hypertensive complications,  
91 caesarean section, macrosomia and stillbirth [2-5]. Managing these complications has significant cost  
92 implications for delivery of antenatal care [2, 4] [6].

93  
94 There is recognition that obstetric management of the obese should be consultant led and involve a multi-  
95 disciplinary team to improve outcome [7, 8]. These recommendations are embedded in clinical guidelines  
96 and standards of care produced by a number of countries [8-13]. However, there is a paucity of evidence  
97 demonstrating that multidisciplinary care and adherence to guidelines results in improved maternal and  
98 offspring outcomes in maternal obesity. There is also less consensus about how multidisciplinary care  
99 should be delivered, and a concern that in areas of high obesity prevalence specialist obesity clinics are  
100 unlikely to be feasible due to cost and the numbers of women who would potentially need to be seen [13].

101  
102 Women with Class III obesity are at particularly high risk of adverse maternal and offspring outcome  
103 [14]. In 2008 we therefore set up a specialist antenatal clinic for women with Class III obesity living in  
104 Edinburgh and the surrounding Lothian area with the aim of improving maternal and offspring outcomes.  
105 At their first antenatal appointment, which is generally prior to 12 weeks gestation, women with a BMI  
106  $>40\text{kg/m}^2$  are offered referral to the specialist clinic or can choose to continue to receive standard  
107 antenatal care. We have a pan-Lothian guideline for clinical management of pregnancies in women with  
108 obesity (Class I, II and III) so that the same care pathway is offered, regardless of who or where it is  
109 delivered. All women with Class III obesity should therefore receive the same standard of care. We  
110 hypothesised that maternal and offspring outcomes would be better in women who had their antenatal  
111 care provided by a multidisciplinary specialist clinic as opposed to receiving standard antenatal care. To  
112 test this hypothesis, we undertook a retrospective case-note review of all women with a BMI  $>40\text{kg/m}^2$

1 113 Specialist clinic improves outcomes in maternal obesity  
2 who delivered in Lothian between 2008 and 2014 and compared clinical outcomes in women who  
3 114 attended for specialist antenatal care compared to those who received standard antenatal care.  
4

5 115

7 116 **Methods**

9 117

11 118 Study population

13 119

15 120 We performed a retrospective case-note review of all women with Class III obesity with a singleton  
16 pregnancy who booked for antenatal care and delivered in either of two hospitals in NHS Lothian trust  
17 121 between 2008 and 2014. The Simpson Centre for Reproductive Health at the Royal Infirmary of  
18 122 Edinburgh is a tertiary referral centre with more than 6,500 deliveries per annum. St John's Hospital,  
19 123 Livingston, is a district general hospital with approximately 2,600 deliveries per annum. Women were  
20 124 excluded if they had not delivered by the end of December 2014, had a multiple pregnancy (n=28), or  
21 125 booked later than 20 weeks gestation (n=18) because this meant they would have missed the gestational  
22 126 window for early screening for GDM [15]. This study was an approved by our local audit committee.  
23 127  
24 128

25 129

26 130 Clinical care pathway

27 131 Women attending the specialist clinic at the Simpson Centre for Reproductive Health, Royal Infirmary of  
28 132 Edinburgh receive multidisciplinary consultant-led care throughout pregnancy from obstetricians,  
29 133 specialist midwives, diabetologists, anaesthetists, dieticians and other specialists as clinically indicated.  
30 134 At their first appointment (~10-16 weeks gestation), women are reviewed individually by a dietician with  
31 135 specialist expertise in weight management during pregnancy and given tailored advice about healthy  
32 136 eating and weight management during pregnancy. They are advised to have early screening for GDM  
33 137 with a fasting blood glucose between 12-16 weeks and late screening using a 75g oral glucose tolerance  
34 138 test between 24-28 weeks, as per the Scottish Intercollegiate Guidelines [15]. If a woman has pre-existing  
35 139 Type 2 diabetes or is diagnosed with GDM during pregnancy, her care remains within the specialist  
36 140 clinic. At each visit, women are weighed, counselled about the maternal and offspring risks associated  
37 141  
38 142  
39 143  
40 144  
41 145  
42 146  
43 147  
44 148  
45 149  
46 150  
47 151  
48 152  
49 153  
50 154  
51 155  
52 156  
53 157  
54 158  
55 159  
56 160  
57 161  
58 162  
59 163  
60 164



Specialist clinic improves outcomes in maternal obesity

1 140 with maternal obesity, and their blood pressure is measured with appropriate sized cuffs. Women are  
2  
3 141 commenced on 75mg aspirin if they have additional risk factors for pre-eclampsia such as a blood  
4  
5 142 pressure of >140/90 mmHg at antenatal booking or primiparity as per national guidelines [16]. All  
6  
7 143 women have postnatal thromboprophylaxis with low molecular weight heparin, with antenatal  
8  
9 144 thromboprophylaxis being commenced if additional risk factors develop [16]. Fetal growth is monitored  
10  
11 145 by serial growth scans at 28, 32 and 36 weeks. All women receive a personalised delivery plan and an  
12  
13 146 anaesthetic review in the third trimester to discuss intrapartum pain management with specific  
14  
15 147 consideration given to obesity related co-morbidities with implications for analgesia and anaesthesia.  
16  
17  
18  
19 148

20  
21 149 Women who do not attend the specialist clinic receive guideline based consultant led care in hospital or  
22  
23 150 community based antenatal clinics. The main difference in care between women who attend the specialist  
24  
25 151 clinic and those who do not, is that if non-attenders develop a complication such as gestational diabetes or  
26  
27 152 needs anaesthetic review, they need to attend a separate specialist clinic to receive this additional care.  
28  
29

30 153 For women who attend the obesity clinic, this care is centralised in a single multi-professional clinic.  
31

32 154  
33  
34 155 To compare maternal and offspring outcomes by antenatal care setting, women were categorised as  
35  
36 156 'attenders' if they attended for two or more appointments at the specialist clinic with the first appointment  
37  
38 157 being before 20 weeks. The rationale for this was that such women would have received early dietary  
39  
40 158 advice and counselling about the importance of attending for early screening for GDM.  
41  
42  
43  
44 159

#### 45 160 Data Collection

46  
47 161 Maternal and offspring data were acquired from the maternity electronic patient records database TRAK  
48  
49 162 (supplied by Intersystems), clinical biochemistry database APEX (ApexHealthware) and the neonatal unit  
50  
51 163 electronic patient records database BadgerNet (supplied by Clevermed) systems.  
52  
53  
54 164

55  
56 165 The following data were collected from the maternal record at booking: maternal age, BMI (kg/m<sup>2</sup>),  
57  
58 166 ethnicity (white, other), parity (P0, P1, P2 or more), smoking status (current, former, never), deprivation  
59  
60

Specialist clinic improves outcomes in maternal obesity

1 167 quintile (a postcode based Scottish Index of Multiple Deprivation from 2012 with five groups ranging  
2  
3 168 from most deprived index (1) to least deprived index (5))[17] and systolic and diastolic blood pressure  
4  
5 169 (mmHg).  
6  
7

8 170  
9  
10 171 Maternal outcomes collected were hypertension (pre-existing, gestational, pre-eclampsia), diabetes (pre-  
11  
12 172 existing, GDM), onset of labour (no labour, spontaneous onset, induced), delivery method (elective  
13  
14 173 caesarean, emergency caesarean, instrumental, spontaneous vaginal), blood loss at delivery and antenatal  
15  
16 174 obstetric attendances. The prevalence of GDM was determined according to (i) the rates of GDM from  
17  
18 175 diagnoses entered into the electronic patient record and (ii) evaluating whether blood glucose values  
19  
20 176 found on the electronic databases conferred a diagnosis of GDM. Diagnostic accuracy of GDM was  
21  
22 177 determined according to Scottish Intercollegiate Guidelines which utilised the World Health Organisation  
23  
24 178 (WHO) recommended thresholds [18] until March 2010 when updated thresholds were published based  
25  
26 179 on the International Association of the Diabetes and Pregnancy Study Groups [19].  
27  
28  
29

30 180  
31  
32 181 Offspring outcomes collected were gender, birthweight, birthweight centile [20], macrosomia (defined as  
33  
34 182 a birthweight  $\geq 4000\text{g}$ ), low birthweight (defined as a birthweight  $\leq 2500\text{g}$ ), gestation of delivery, preterm  
35  
36 183 birth (defined as birth  $< 259$  days gestation) and outcome (livebirth, stillbirth).  
37  
38

39 184  
40  
41 185 All data were anonymised with personal identifiers removed before analysis. To maximize accuracy and  
42  
43 186 to minimise missing data all records were reviewed by HM and LS, glucose data was reviewed by KS and  
44  
45 187 LS with any discrepancies reviewed by FD, RR. For stillbirths, a perinatal pathologist examined placental  
46  
47 188 pathology as is routine clinical practice. HM and LS independently identified risk factors and categorised  
48  
49 189 the likely causality of the stillbirths. Stillbirth causation was checked and verified by a third investigator  
50  
51 190 (FD). All investigators were blinded to whether a woman did or did not attend the specialist clinic until  
52  
53 191 risk factors and likely causality was agreed for all stillbirths.  
54  
55

56 192  
57

58 193 Statistical Analysis  
59  
60

Specialist clinic improves outcomes in maternal obesity

1 194 Data were analysed using the Statistical Package for the Social Sciences (SPSS) Version 21. Differences  
2  
3 195 in the characteristics and clinical outcomes between the women who attended the specialist obesity clinic  
4  
5 196 and those who received standard care were tested using the student's t-test if the variable was continuous  
6  
7 197 or the chi-squared test for categorical variables. Logistic regression was used to adjust for BMI and  
8  
9 198 parity. A p-value  $<0.05$  was considered statistically significant.  
10  
11  
12 199

13  
14 200 Results

15  
16 201 Demographics

17  
18 202 Maternal demographics are demonstrated in Table 1. Compared to non-attenders, women who attended  
19  
20 203 the specialist clinic had a higher BMI, and were more likely to be primiparous. There were no differences  
21  
22 204 in age, ethnicity, smoking status, deprivation quintile and systolic or diastolic blood pressure at booking  
23  
24 205 between attenders and non-attenders.  
25  
26 206

27  
28 207 Maternal outcomes

29  
30 208 Maternal outcomes are demonstrated in Table 2. After excluding women with pre-existing Type 1 and  
31  
32 209 Type 2 diabetes, all women who attended the specialist clinic had a screening test with sufficient  
33  
34 210 information being collected to confirm or exclude a diagnosis of GDM. In contrast, 26.4% (128/484) of  
35  
36 211 non-attenders either had no screening test for GDM or insufficient information was collected for a  
37  
38 212 diagnosis of GDM to be made. The clinical diagnosis of GDM from the patient record matched the  
39  
40 213 diagnosis from blood glucose levels in all women who attended the specialist clinic. In contrast, in non-  
41  
42 214 attenders, when the notes and actual blood glucose values were compared, the 'wrong' diagnosis was  
43  
44 215 made in 17 women. One woman was incorrectly diagnosed with GDM when her screening test for GDM  
45  
46 216 was normal. A further 16 woman had a positive diagnostic test for GDM according to glucose values  
47  
48 217 obtained during a glucose tolerance test but the diagnosis was missed and these women were incorrectly  
49  
50 218 labelled as not having GDM (and did not therefore receive treatment).  
51  
52  
53  
54  
55  
56  
57  
58  
59  
60

### Specialist clinic improves outcomes in maternal obesity

220 Compared to non-attenders, women who attended the specialist clinic were more likely to have their  
221 labour induced, to have a caesarean or instrumental vaginal delivery. Specialist clinic attenders had a  
222 higher blood loss at delivery than non-attenders even after adjusting for mode of delivery, BMI, age and  
223 parity ( $p=0.02$ ). They were also more likely to attend obstetric triage one or more times during pregnancy.  
224 Rates of pre-existing chronic hypertension and hypertensive complications (gestational hypertension and  
225 pre-eclampsia) were low in both attenders and non-attenders. Rates of Type 2 diabetes were higher in  
226 non-attenders compared to attenders.

227

### Offspring outcomes

229 The clinical details for the offspring outcomes are demonstrated in Table 3. Compared to non-attenders,  
230 attenders were less likely to have a stillbirth (Odds Ratio (OR), 95% Confidence Interval (CI) 0.12, 0.06-  
231 0.97) and a low birthweight baby (OR, 95% CI 0.57, 0.33-0.99). The lower stillbirth outcomes in  
232 attenders were attenuated in analyses adjusting for BMI and parity (adjusted OR (AOR), 95% CI 0.14,  
233 0.02-1.17) but the lower risk of having a low birthweight baby (in the attendees) was strengthened in  
234 adjusted analyses (AOR, 95% CI 0.52, 0.29-0.93). The clinical details of the women who had a stillbirth  
235 are demonstrated in Table 4. In non-attenders, an additional risk factor for stillbirth was identified in 7  
236 women and a probable cause for stillbirth was identified in all 8 women. No additional risk factors or  
237 cause was identified in the one woman who had a stillbirth who attended the specialist clinic.

238

### Discussion

240 In this retrospective case-note review, we demonstrated that women with Class III obesity who attended a  
241 specialist multidisciplinary antenatal clinic were less likely to have a stillbirth and low birthweight infant  
242 and more likely to be tested, correctly diagnosed with and treated for GDM, and to have an induction of  
243 labour, caesarean section and higher blood loss at delivery compared to those receiving standard antenatal  
244 care. These differences in outcomes were accompanied by increased attendance at obstetric triage.

245

### Main Findings

246

## Specialist clinic improves outcomes in maternal obesity

1 247 A key study finding was that rates of stillbirth and low birthweight were lower in women who attended  
2  
3 248 the clinic compared to those who did. Compared to non-attenders, women who attended the specialist  
4  
5 249 clinic had a higher BMI, and were more likely to be primiparous. Given that primiparity and higher BMI  
6  
7 250 are independently associated with increased risk of stillbirth and low birthweight [21-23], we expected  
8  
9 251 that rates of stillbirth and low birthweight would be higher in attenders compared to non-attenders.  
10  
11 252 However, we found the converse to be the case, with fewer stillborn and low birthweight babies being  
12  
13 253 born to attenders, even after adjusting for parity and BMI.  
14  
15  
16  
17 254

18  
19 255 The stillbirth rate in women who attended the specialist clinic was 2 per 1000 compared to a rate of 7 per  
20  
21 256 1000 for women with a BMI > 40 kg/m<sup>2</sup> who delivered in Scotland in 2011 - 2012 [24]. To validate this  
22  
23 257 finding, three investigators who were blinded to whether women did or did not attend the clinic  
24  
25 258 independently checked the stillbirth data. It was striking that additional risk factors were identified in 7  
26  
27 259 and a cause for stillbirth identified in all 8 non-attenders who had a stillbirth but no additional risk factors  
28  
29 260 or cause was identified in the one woman who had a stillbirth who did attend the clinic. We accept that  
30  
31 261 rates of unexplained stillbirth are generally reported as being 20 – 25% which is much higher than what  
32  
33 262 we found in our study. We therefore acknowledge the stillbirth findings and causality need to be  
34  
35 263 interpreted with caution due to the small sample size and attenuation of findings in adjusted analyses.  
36  
37 264 However it is tempting to speculate that the continuity of care together with the education of women by  
38  
39 265 the multidisciplinary clinic team raised increased awareness of the importance of risk factors such as  
40  
41 266 reduced fetal movements amongst attenders and this may have led to them presenting earlier and being  
42  
43 267 delivered prior to stillbirth occurring. Future studies such as the AFFIRM clinical trial (NCTT01777022,  
44  
45 268 due to complete in 2017) are designed to address this in the general antenatal population.  
46  
47  
48  
49 269

## 270 Strengths and Limitations

51  
52 271 A strength of our study is that we were able to compare important clinical outcomes in women and  
53  
54 272 offspring such as stillbirth. We also used routinely collected clinical data meaning that our results are  
55  
56 273 relevant to clinical practice in which multiple different care pathways exist. We accept that a limitation of  
57  
58  
59  
60

Specialist clinic improves outcomes in maternal obesity

1 274 our study is that this was a retrospective case-note review and our sample size was therefore limited by  
2  
3 275 the study population. For the majority of data fields, other than smoking status (43.8% missing), there  
4  
5 276 was a relatively low proportion of missing data. For the smoking variable, this was due to smoking status  
6  
7 277 not being a mandatory field for recording on the electronic clinical record prior to 2012. The study was  
8  
9 278 also not randomised, so women could choose whether to attend the specialist clinic. However, apart from  
10  
11 279 differences in maternal BMI and primiparity between attenders and non-attenders, all other demographic  
12  
13 280 factors were comparable between groups. Given that the clinical outcomes were better in women  
14  
15 281 attending the specialist clinic who were arguably at higher risk than the non-attenders due to their higher  
16  
17 282 BMI and more likely to be primiparous, we believe that our finding that multidisciplinary care improves  
18  
19 283 clinical outcomes in pregnant women with Class III obesity compared to standard care is clinically  
20  
21 284 important.  
22  
23  
24  
25  
26  
27

285

286 Interpretation

287 In other general and high-risk populations, pregnancy outcomes tend to be worse in women who either  
288 under- or do not attend for any antenatal care [25]. However, although we categorised women into  
289 attenders or non-attenders, this was only in relation to whether they attended the specialist clinic for  
290 antenatal care. In 1993, the landmark Changing Childbirth Report [26], which was built on the 1992  
291 Winterton Report, reversed the official policy that hospital is always the safest place for birth and  
292 emphasised the importance of maternal choice, control and continuity of carer for women. These  
293 recommendations, which were made over 20 years ago are still as relevant today, and frame the rhetoric  
294 and delivery of antenatal care across the UK [27-30]. In Lothian, all women receiving community-led  
295 care have a named midwife who coordinates their care. This midwife is part of a community team which  
296 has a defined case-load. This model ensures that there is continuity of care for a woman at both the  
297 individual midwife and midwifery team-level. If a woman is deemed high risk (such as would be the case  
298 in women with Class III obesity), she is also designated a named Consultant to oversee her care. Despite  
299 this model of continuity of care, our study demonstrates that maternal and offspring outcomes are better

Specialist clinic improves outcomes in maternal obesity

300 in women who attend a hospital based specialist clinic compared to those who receive standard antenatal  
301 care.

302  
303 Although specialist clinics have been advocated as a way of improving maternal and offspring outcomes,  
304 there is currently a paucity of evidence from randomised controlled trials about the benefits and harms of  
305 'specialist' antenatal clinics compared with 'standard' antenatal care for women [31]. For example,  
306 systematic reviews of randomised controlled trials have concluded that there is currently limited  
307 information to assess the role of 'specialist' antenatal clinics for women with a multiple pregnancy [32]  
308 and no clear evidence that 'specialist' clinics reduce the number of preterm births [33]. Given that the  
309 antenatal care pathway followed was the same in attenders compared to non-attenders, it is not clear why  
310 maternal and offspring outcomes were better in women who attended the specialist clinic compared to  
311 those who did not. A recent systematic review by Sandall et al. highlighted the importance of continuity  
312 of care, demonstrating that pregnant women receiving midwife-led continuity models of care had at least  
313 comparable clinical outcomes and were likely to experience less intervention [34]. It is therefore plausible  
314 that the continuity of care that the specialist multidisciplinary team provided enabled compromised  
315 pregnancies to be identified more accurately and interventions such as induction of labour to be targeted  
316 more appropriately compared to those women receiving standard care.

317  
318 Conclusion

319 In summary, our study demonstrates that attendance at a multidisciplinary specialist antenatal clinic  
320 improves maternal and offspring outcomes in women with Class III obesity. This challenges current  
321 recommendations that women with very Class III obesity can be effectively managed outside a specialist  
322 service. Further research is needed to identify the most appropriate and economic model of care for  
323 women with Class III obesity to optimise maternal and offspring outcomes.

324  
325 Acknowledgements



Specialist clinic improves outcomes in maternal obesity

326 We would like to acknowledge Mr Allyn Dick for assistance in extracting the clinical data from maternity

327 TRAK.

328

329 Copyright

330 The Corresponding Author has the right to grant on behalf of all authors and does grant on behalf of all

331 authors, [a worldwide licence](#) to the Publishers and its licensees in perpetuity, in all forms, formats and

332 media (whether known now or created in the future), to i) publish, reproduce, distribute, display and store

333 the Contribution, ii) translate the Contribution into other languages, create adaptations, reprints, include

334 within collections and create summaries, extracts and/or, abstracts of the Contribution, iii) create any

335 other derivative work(s) based on the Contribution, iv) to exploit all subsidiary rights in the Contribution,

336 v) the inclusion of electronic links from the Contribution to third party material where-ever it may be

337 located; and, vi) licence any third party to do any or all of the above.

338

339 Disclosure of Interests

340 The authors have no interests to disclose.

341

342 Contribution to authorship

343 FD and RR conceived the study and drafted the paper. FD, HM, LS, KS, JN and RR designed the study.

344 FD, HM, LS, KS and RR acquired and analysed the data. All authors interpreted the data, revised the

345 paper critically for important intellectual content and approved the final version.

346

347 Details of Ethics Approval

348 This study was approved by our local audit committee.

349

350 Funding

351 We acknowledge funding from Tommy's the Baby Charity



## Specialist clinic improves outcomes in maternal obesity

## 352 References

1. Report, C.f.M.a.C.E., *Maternal obesity in the UK: findings from a national project*, in *Centre for Maternal and Child Enquiries* 2010: Chiltern Court, 188 Baker Street, London, NW1 5SD.
2. Denison, F.C., et al., *Association between maternal body mass index during pregnancy, short-term morbidity, and increased health service costs: a population-based study*. *BJOG*, 2014. **121**(1): p. 72-81; discussion 82.
3. Denison, F.C. and C. Chiswick, *Improving pregnancy outcome in obese women*. *Proc Nutr Soc*, 2011. **70**(4): p. 457-64.
4. Denison, F.C., et al., *Increased Maternal BMI is associated with an Increased Risk of Minor Complications during Pregnancy With Consequent Cost Implications*. *BJOG*, 2009. **116**(11): p. 1467-72.
5. Reynolds, R.M., et al., *Maternal and Offspring Outcomes of Pregnancies associated with Severe Obesity: Study design and preliminary data from the Hormones and Inflammation in Obese Pregnancy Study*. *J of Developmental Origins of Health and Disease* 2009: p. P7A-318.
6. Morgan, K.L., et al., *Obesity in pregnancy: a retrospective prevalence-based study on health service utilisation and costs on the NHS*. *BMJ Open*, 2014. **4**(2): p. e003983.
7. Ghaffari, N., S.K. Srinivas, and C.P. Durnwald, *The multidisciplinary approach to the care of the obese parturient*. *Am J Obstet Gynecol*, 2015. **213**(3): p. 318-25.
8. Jarvie, E. and J.E. Ramsay, *Obstetric management of obesity in pregnancy*. *Semin Fetal Neonatal Med*, 2010. **15**(2): p. 83-8.
9. *ACOG Committee Opinion No. 650: Physical Activity and Exercise During Pregnancy and the Postpartum Period*. *Obstet Gynecol*, 2015. **126**(6): p. e135-42.
10. *ACOG Practice Bulletin No 156: Obesity in Pregnancy*. *Obstet Gynecol*, 2015. **126**(6): p. e112-26.
11. Alavi, N., et al., *Comparison of national gestational weight gain guidelines and energy intake recommendations*. *Obes Rev*, 2013. **14**(1): p. 68-85.
12. Fitzsimons, K.J. and J. Modder, *Setting maternity care standards for women with obesity in pregnancy*. *Semin Fetal Neonatal Med*, 2010. **15**(2): p. 100-7.
13. *RCOG, Management of Women with Obesity in Pregnancy in RCOG CMACE/RCOG*, Editor 2010, CMACE/RCOG: London.
14. Lutsiv, O., et al., *The effects of morbid obesity on maternal and neonatal health outcomes: a systematic review and meta-analyses*. *Obes Rev*, 2015. **16**(7): p. 531-46.
15. Network, S.I.G., *Management of Diabetes: A national clinical guideline*, 2014, Scottish Intercollegiate Guidelines Network: Edinburgh.
16. NICE, *Hypertension in pregnancy: diagnosis and management: CG107*, 2011.
17. Government, T.S., *Scottish Index of Multiple Deprivation 2012. A National Statistics Publication for Scotland*, in *National Statistics* 2012, The Scottish Government.
18. (SIGN), S.I.G.N., *Management of Diabetes. SIGN publication no.55*, 2001, SIGN: Edinburgh.
19. International Association of, D., et al., *International association of diabetes and pregnancy study groups recommendations on the diagnosis and classification of hyperglycemia in pregnancy*. *Diabetes Care*, 2010. **33**(3): p. 676-82.
20. Bonellie, S., et al., *Centile charts for birthweight for gestational age for Scottish singleton births*. *BMC Pregnancy Childbirth*, 2008. **8**: p. 5.
21. Aune, D., et al., *Maternal body mass index and the risk of fetal death, stillbirth, and infant death: a systematic review and meta-analysis*. *JAMA*, 2014. **311**(15): p. 1536-46.
22. Flenady, V., et al., *Stillbirths: the way forward in high-income countries*. *Lancet*, 2011. **377**(9778): p. 1703-17.
23. Shah, P.S. and L.B.W.P.T.b. Knowledge Synthesis Group on Determinants of, *Parity and low birth weight and preterm birth: a systematic review and meta-analyses*. *Acta Obstet Gynecol Scand*, 2010. **89**(7): p. 862-75.
24. *ISD. Stillbirth and Infant Deaths*. 2016 [cited 2016 14th November, 2016]; Available from: <http://www.isdscotland.org/health-Topics/Maternity-and-Births/Stillbirth-and-Infant-Deaths/>.

## Specialist clinic improves outcomes in maternal obesity

- 1 404 25. Raatikainen, K., N. Heiskanen, and S. Heinonen, *Under-attending free antenatal care is*  
2 405 *associated with adverse pregnancy outcomes*. BMC Public Health, 2007. 7: p. 268.
- 3 406 26. Health, D.o., *Changing childbirth. Part 1: report of the Expert Maternity Group.*, D.o. Health,  
4 407 Editor 1993, Department of Health: London.
- 5 408 27. Health, D.o., *National Service Framework for children, young people and maternity services:*  
6 409 *maternity services*, 2004, Department of Health: London.
- 7 410 28. Health, D.o., *Maternity matters: choice, access and continuity of care in a safe service*, 2007,  
8 411 Department of Health: London.
- 9 412 29. Government, S. *A Refreshed Framework for Maternity Care in Scotland*. 2011 [cited 2016 24th  
10 413 October, 2016]; Available from: <http://www.gov.scot/resource/doc/337644/0110854.pdf>.
- 11 414 30. *Better Births - Improving outcomes of maternity services in England*, N.M. Review, Editor 2016.
- 12 415 31. Dodd, J.M. and C.A. Crowther, *Specialised antenatal clinics for women with a multiple*  
13 416 *pregnancy for improving maternal and infant outcomes*. Cochrane Database Syst Rev, 2012(8): p.  
14 417 CD005300.
- 15 418 32. Dodd, J.M., T. Dowswell, and C.A. Crowther, *Specialised antenatal clinics for women with a*  
16 419 *multiple pregnancy for improving maternal and infant outcomes*. Cochrane Database Syst Rev,  
17 420 2015(11): p. CD005300.
- 18 421 33. Whitworth, M., et al., *Specialised antenatal clinics for women with a pregnancy at high risk of*  
19 422 *preterm birth (excluding multiple pregnancy) to improve maternal and infant outcomes*. Cochrane  
20 423 Database Syst Rev, 2011(9): p. CD006760.
- 21 424 34. Sandall, J., et al., *Midwife-led continuity models versus other models of care for childbearing*  
22 425 *women*. Cochrane Database Syst Rev, 2016. 4: p. CD004667.
- 23 426  
24 427  
25 428  
26  
27  
28  
29  
30  
31  
32  
33  
34  
35  
36  
37  
38  
39  
40  
41  
42  
43  
44  
45  
46  
47  
48  
49  
50  
51  
52  
53  
54  
55  
56  
57  
58  
59  
60

## Specialist clinic improves outcomes in maternal obesity

**Table 1: Demographics of population**

|                                              | Attendees<br>(n=511) | Non-attendees<br>(n=502) | P value |
|----------------------------------------------|----------------------|--------------------------|---------|
| Age (years; mean (SD))                       | 29.8 (5.4)           | 29.3 (5.5)               | 0.11    |
| BMI (kg/m <sup>2</sup> ; mean (SD))          | 44.5 (4.3)           | 43.2 (3.1)               | <0.001  |
| Ethnicity (n (%))*                           |                      |                          | 0.35    |
| White                                        | 441 (94.6%)          | 432 (92.9%)              |         |
| Other                                        | 25 (5.4%)            | 33 (7.1%)                |         |
| Parity (n (%))                               |                      |                          | <0.001  |
| 0                                            | 235 (46.0%)          | 125 (24.9%)              |         |
| 1                                            | 161 (31.5%)          | 212 (42.2%)              |         |
| 2 or more                                    | 115 (22.5%)          | 165 (32.9%)              |         |
| Smoking status (n (%))*                      |                      |                          | 0.51    |
| Current                                      | 45 (17.2%)           | 42 (13.7%)               |         |
| Former                                       | 63 (24.0%)           | 79 (25.7%)               |         |
| Never                                        | 154 (58.8%)          | 186 (60.6%)              |         |
| Deprivation quintile (n (%)) <sup>1</sup> *  |                      |                          | 0.07    |
| 1                                            | 140 (27.7%)          | 108 (22.2%)              |         |
| 2                                            | 141 (27.9%)          | 150 (30.9%)              |         |
| 3                                            | 95 (18.8%)           | 107 (22.0%)              |         |
| 4                                            | 66 (13.1%)           | 74 (15.2%)               |         |
| 5                                            | 63 (12.5%)           | 47 (9.7%)                |         |
| Systolic blood pressure (mmHg; mean (SD))    | 122 (11.9)           | 122 (11.1)               | 0.79    |
| Diastolic blood pressure (mmHg) <sup>1</sup> | 75 (9.0)             | 75 (8.0)                 | 0.98    |

\*missing data includes n=82 (8%) from ethnicity, n=444 (44%) from smoking and n=12 (1.2%) from deprivation quintile. Missing data is high from smoking as this was not a mandatory field on the electronic record until 2012; <sup>1</sup>deprivation quintile where 1 is the most and 5 the least deprived.

## Specialist clinic improves outcomes in maternal obesity

**Table 2: Maternal outcomes**

|                                            | Attenders<br>N=511 | Non-attenders<br>N=502 | <i>P</i> value |
|--------------------------------------------|--------------------|------------------------|----------------|
| Pre-existing co-morbidities                |                    |                        |                |
| Type 2 diabetes (n; %)                     | 2 (0.4%)           | 12 (2.4%)              | 0.008          |
| Hypertensive complications                 |                    |                        |                |
| Chronic hypertension (n; %)                | 16 (1.6%)          | 11 (1.1%)              | 0.27           |
| Gestational hypertension (n; %)            | 18 (1.8%)          | 16 (1.6%)              |                |
| Pre-eclampsia (n; %)                       | 31 (3.1%)          | 25 (2.5%)              |                |
| Gestational diabetes*                      |                    |                        |                |
| Screening/diagnostic test performed (n; %) | 496 (100%)         | 356 (73.6%)            | <0.001         |
| Prevalence (n; %)                          | 129 (26.0%)        | 61 (12.5%)             | <0.001         |
| Labour and delivery                        |                    |                        |                |
| Onset labour (n; %)                        |                    |                        | 0.009          |
| No labour                                  | 111 (21.7%)        | 109 (21.7%)            |                |
| Spontaneous onset                          | 204 (39.9%)        | 243 (48.4%)            |                |
| Induction                                  | 196 (38.4%)        | 150 (29.9%)            |                |
| Delivery method (n; %)                     |                    |                        |                |
| Elective caesarean                         | 103 (20.2%)        | 89 (17.7%)             | <0.001         |
| Emergency caesarean                        | 122 (23.9%)        | 102 (20.3%)            |                |
| Instrumental                               | 56 (11.0%)         | 23 (4.6%)              |                |
| Spontaneous vertex                         | 229 (44.9%)        | 288 (57.4%)            |                |
| Blood loss at delivery (mls; mean (SD))    | 575 (464)          | 465 (387)              | <0.001         |
| Obstetric triage attendances (n; %)        |                    |                        |                |
| 0                                          | 108 (21.1%)        | 229 (45.6%)            | <0.001         |
| 1                                          | 132 (25.8%)        | 104 (20.7%)            |                |
| 2                                          | 93 (18.2%)         | 70 (13.9%)             |                |
| 3 or more                                  | 172 (33.7%)        | 93 (18.5%)             |                |

\*Denominator excludes women with pre-existing diabetes (type 1 or 2) or those who were not managed at the tertiary referral centre. In attenders and non-attenders, the prevalence is based on blood glucose levels and not the clinical diagnosis recorded in the notes.

## Specialist clinic improves outcomes in maternal obesity

**Table 3: Offspring outcomes**

|                                     | Attenders<br>N=511 | Non-attenders<br>N=502 | Significance<br>( <i>P</i> value) |
|-------------------------------------|--------------------|------------------------|-----------------------------------|
| Gender (n; %)                       |                    |                        | 0.34                              |
| Female                              | 238 (46.6%)        | 249 (49.6%)            |                                   |
| Male                                | 273 (53.4%)        | 253 (50.4%)            |                                   |
| Birthweight (g; mean (SD))          | 3576 (635)         | 3559 (664)             | 0.69                              |
| Macrosomia <sup>1</sup> (n; %)      | 31 (6.1%)          | 26 (5.2%)              | 0.54                              |
| Low birthweight <sup>2</sup> (n; %) | 21 (4.1%)          | 35 (7.0%)              | 0.04                              |
| Gestation (days; mean (SD))         | 277 (14.1)         | 277 (14.7)             | 0.82                              |
| Preterm birth <sup>3</sup> (n; %)   | 40 (7.8%)          | 39 (8.4%)              | 0.97                              |
| Outcome (n; %)                      |                    |                        |                                   |
| Livebirth                           | 510 (99.8%)        | 494 (98.4%)            | 0.02                              |
| Stillbirth                          | 1 (0.2%)           | 8 (1.6%)               |                                   |

<sup>1</sup>macrosomia defined as birthweight of 4000g or more; <sup>2</sup>low birthweight defined as birthweight of 2500g or lower;

<sup>3</sup>preterm birth defined as birth before 259 days gestation.

## Specialist clinic improves outcomes in maternal obesity

1 452

2 453

3 454 **Table 4: Details of stillbirths**

4 455

| Case | Demographics |        |                          | Risk factors                             | Outcome                    | Birthweight centile <sup>1</sup>    | Cause                                |
|------|--------------|--------|--------------------------|------------------------------------------|----------------------------|-------------------------------------|--------------------------------------|
|      | Age (years)  | Parity | BMI (kg/m <sup>2</sup> ) |                                          |                            |                                     |                                      |
| NA1  | 31           | P2     | 42                       | Smoker, type 2 diabetes, RFM             | 33+5 weeks, male, 2050g    | 25 <sup>th</sup> – 50 <sup>th</sup> | Uncontrolled hypertension, abruption |
| NA2  | 32           | P1     | 42                       | No risk factors                          | 30+5 weeks, female, 700g,  | <3 <sup>rd</sup>                    | IUGR, placental insufficiency        |
| NA3  | 38           | P4     | 42                       | RFM                                      | 37 weeks, male, 2720g,     | 10 <sup>th</sup> – 25 <sup>th</sup> | Severe pre-eclampsia, abruption      |
| NA4  | 32           | P2     | 45                       | Smoker, RFM                              | 36 weeks, male, 2160g,     | 5 <sup>th</sup> – 10 <sup>th</sup>  | Acute intra-uterine hypoxia          |
| NA5  | 26           | P2     | 47                       | Smoker, RFM, isolated congenital anomaly | 35+5 weeks, female, 2155g, | 10 <sup>th</sup> – 25 <sup>th</sup> | Congenital anomaly                   |
| NA6  | 32           | P2     | 52                       | Smoker                                   | 30+5 weeks, female, 1620g, | 75 <sup>th</sup> – 90 <sup>th</sup> | Abruption                            |
| NA7  | 27           | P2     | 40                       | Type 2 diabetes, RFM                     | 38+2 weeks, male, 3370g,   | 50 <sup>th</sup> – 75 <sup>th</sup> | Poorly controlled diabetes           |
| NA8  | 21           | P0     | 40                       | Smoker                                   | 26+3 weeks, female, 750g,  | 25 <sup>th</sup> – 50 <sup>th</sup> | IUGR, placental insufficiency        |
| A1   | 20           | P1     | 41                       | No risk factors                          | 39+5 weeks, male, 3725g,   | 50 <sup>th</sup> – 75 <sup>th</sup> | Unexplained                          |

28 456 Key: NA non-attender, A attender, <sup>1</sup> birthweight centile defined by (Bonellie et al., 2008); BMI body mass index,

29 457 RFM reduced fetal movements, IUGR intrauterine growth restriction, placental insufficiency diagnosed by

30 458 perinatal pathologist

31 459

The RECORD statement – checklist of items, extended from the STROBE statement, that should be reported in observational studies using routinely collected health data.

|                           | Item No. | STROBE items                                                                                                                                                                               | Location in manuscript where items are reported | RECORD items                                                                                                                                                                                                                                                                                                                                                                                                                                | Location in manuscript where items are reported                     |
|---------------------------|----------|--------------------------------------------------------------------------------------------------------------------------------------------------------------------------------------------|-------------------------------------------------|---------------------------------------------------------------------------------------------------------------------------------------------------------------------------------------------------------------------------------------------------------------------------------------------------------------------------------------------------------------------------------------------------------------------------------------------|---------------------------------------------------------------------|
| <b>Title and abstract</b> |          |                                                                                                                                                                                            |                                                 |                                                                                                                                                                                                                                                                                                                                                                                                                                             |                                                                     |
|                           | 1        | (a) Indicate the study's design with a commonly used term in the title or the abstract (b) Provide in the abstract an informative and balanced summary of what was done and what was found | (a) Page 1<br>(b) Page 4-5                      | RECORD 1.1: The type of data used should be specified in the title or abstract. When possible, the name of the databases used should be included.<br><br>RECORD 1.2: If applicable, the geographic region and timeframe within which the study took place should be reported in the title or abstract.<br><br>RECORD 1.3: If linkage between databases was conducted for the study, this should be clearly stated in the title or abstract. | 1.1: Lines 52-53<br><br>1.2: Lines 57-58<br><br>1.3: Not applicable |
| <b>Introduction</b>       |          |                                                                                                                                                                                            |                                                 |                                                                                                                                                                                                                                                                                                                                                                                                                                             |                                                                     |
| Background rationale      | 2        | Explain the scientific background and rationale for the investigation being reported                                                                                                       | Page 6 & 7, lines 83 - 111                      |                                                                                                                                                                                                                                                                                                                                                                                                                                             |                                                                     |
| Objectives                | 3        | State specific objectives, including any prespecified hypotheses                                                                                                                           | Page 6 & 7, lines 106 - 111                     |                                                                                                                                                                                                                                                                                                                                                                                                                                             |                                                                     |
| <b>Methods</b>            |          |                                                                                                                                                                                            |                                                 |                                                                                                                                                                                                                                                                                                                                                                                                                                             |                                                                     |
| Study Design              | 4        | Present key elements of study design early in the paper                                                                                                                                    | Page 7 & 8, lines 117 - 155                     |                                                                                                                                                                                                                                                                                                                                                                                                                                             |                                                                     |
| Setting                   | 5        | Describe the setting, locations, and relevant dates, including periods of recruitment, exposure, follow-up, and data collection                                                            | Page 7, lines 117 - 124                         |                                                                                                                                                                                                                                                                                                                                                                                                                                             |                                                                     |
| Participants              | 6        | (a) <i>Cohort study</i> - Give the eligibility criteria, and the                                                                                                                           | (a) Page 7 & 8, lines 127 - 155                 | RECORD 6.1: The methods of study population selection (such as codes or                                                                                                                                                                                                                                                                                                                                                                     | 6.1: Lines 152 - 155                                                |



|                                                                                                                                           |                              |                                                                                                                                                                                                                                                                                                                                                                                                                                                                                                                                                                                                                                                             |                                                                                                                                                                                      |                                                                                                                                                                                                                                                                                                                                                                                                                                                                                                                                                                                                                              |                                                                                                                                                                                                                 |                             |
|-------------------------------------------------------------------------------------------------------------------------------------------|------------------------------|-------------------------------------------------------------------------------------------------------------------------------------------------------------------------------------------------------------------------------------------------------------------------------------------------------------------------------------------------------------------------------------------------------------------------------------------------------------------------------------------------------------------------------------------------------------------------------------------------------------------------------------------------------------|--------------------------------------------------------------------------------------------------------------------------------------------------------------------------------------|------------------------------------------------------------------------------------------------------------------------------------------------------------------------------------------------------------------------------------------------------------------------------------------------------------------------------------------------------------------------------------------------------------------------------------------------------------------------------------------------------------------------------------------------------------------------------------------------------------------------------|-----------------------------------------------------------------------------------------------------------------------------------------------------------------------------------------------------------------|-----------------------------|
| 1<br>2<br>3<br>4<br>5<br>6<br>7<br>8<br>9<br>10<br>11<br>12<br>13<br>14<br>15<br>16<br>17<br>18<br>19<br>20<br>21<br>22<br>23<br>24<br>25 |                              | <p>sources and methods of selection of participants. Describe methods of follow-up</p> <p><i>Case-control study</i> - Give the eligibility criteria, and the sources and methods of case ascertainment and control selection. Give the rationale for the choice of cases and controls</p> <p><i>Cross-sectional study</i> - Give the eligibility criteria, and the sources and methods of selection of participants</p> <p>(b) <i>Cohort study</i> - For matched studies, give matching criteria and number of exposed and unexposed</p> <p><i>Case-control study</i> - For matched studies, give matching criteria and the number of controls per case</p> | (b) Page 8, lines 152 - 155                                                                                                                                                          | <p>algorithms used to identify subjects) should be listed in detail. If this is not possible, an explanation should be provided.</p> <p>RECORD 6.2: Any validation studies of the codes or algorithms used to select the population should be referenced. If validation was conducted for this study and not published elsewhere, detailed methods and results should be provided.</p> <p>RECORD 6.3: If the study involved linkage of databases, consider use of a flow diagram or other graphical display to demonstrate the data linkage process, including the number of individuals with linked data at each stage.</p> | <p>6.2: Not applicable</p> <p>6.3: Not applicable</p>                                                                                                                                                           |                             |
| 26<br>27<br>28<br>29<br>30<br>31<br>32                                                                                                    | Variables                    | 7                                                                                                                                                                                                                                                                                                                                                                                                                                                                                                                                                                                                                                                           | Clearly define all outcomes, exposures, predictors, potential confounders, and effect modifiers. Give diagnostic criteria, if applicable.                                            | Page 8 & 9: lines 158 - 189                                                                                                                                                                                                                                                                                                                                                                                                                                                                                                                                                                                                  | RECORD 7.1: A complete list of codes and algorithms used to classify exposures, outcomes, confounders, and effect modifiers should be provided. If these cannot be reported, an explanation should be provided. | Page 8 & 9: lines 158 - 189 |
| 33<br>34<br>35<br>36<br>37<br>38<br>39<br>40<br>41                                                                                        | Data sources/<br>measurement | 8                                                                                                                                                                                                                                                                                                                                                                                                                                                                                                                                                                                                                                                           | For each variable of interest, give sources of data and details of methods of assessment (measurement). Describe comparability of assessment methods if there is more than one group | Page 8 & 9: lines 158 - 189                                                                                                                                                                                                                                                                                                                                                                                                                                                                                                                                                                                                  |                                                                                                                                                                                                                 |                             |
| 42<br>43                                                                                                                                  | Bias                         | 9                                                                                                                                                                                                                                                                                                                                                                                                                                                                                                                                                                                                                                                           | Describe any efforts to address potential sources of bias                                                                                                                            | Page 9: lines 184 - 189                                                                                                                                                                                                                                                                                                                                                                                                                                                                                                                                                                                                      |                                                                                                                                                                                                                 |                             |
| 44<br>45                                                                                                                                  | Study size                   | 10                                                                                                                                                                                                                                                                                                                                                                                                                                                                                                                                                                                                                                                          | Explain how the study size was                                                                                                                                                       | Page 7: lines 117 -                                                                                                                                                                                                                                                                                                                                                                                                                                                                                                                                                                                                          |                                                                                                                                                                                                                 |                             |



|                                                                                                                                            |                                  |            |                                                                                                                                                                                                                                                                                                                                                                                                                                                                                                                                                                      |                                                                                                                                                                                                                                                              |                                                                    |
|--------------------------------------------------------------------------------------------------------------------------------------------|----------------------------------|------------|----------------------------------------------------------------------------------------------------------------------------------------------------------------------------------------------------------------------------------------------------------------------------------------------------------------------------------------------------------------------------------------------------------------------------------------------------------------------------------------------------------------------------------------------------------------------|--------------------------------------------------------------------------------------------------------------------------------------------------------------------------------------------------------------------------------------------------------------|--------------------------------------------------------------------|
|                                                                                                                                            |                                  | arrived at | 121                                                                                                                                                                                                                                                                                                                                                                                                                                                                                                                                                                  |                                                                                                                                                                                                                                                              |                                                                    |
| 1<br>2<br>3<br>4<br>5<br>6<br>7                                                                                                            | Quantitative variables           | 11         | Explain how quantitative variables were handled in the analyses. If applicable, describe which groupings were chosen, and why                                                                                                                                                                                                                                                                                                                                                                                                                                        | Page 8 & 9: lines 158 - 189                                                                                                                                                                                                                                  |                                                                    |
| 8<br>9<br>10<br>11<br>12<br>13<br>14<br>15<br>16<br>17<br>18<br>19<br>20<br>21<br>22<br>23<br>24<br>25<br>26<br>27<br>28<br>29<br>30<br>31 | Statistical methods              | 12         | (a) Describe all statistical methods, including those used to control for confounding<br>(b) Describe any methods used to examine subgroups and interactions<br>(c) Explain how missing data were addressed<br>(d) <i>Cohort study</i> - If applicable, explain how loss to follow-up was addressed<br><i>Case-control study</i> - If applicable, explain how matching of cases and controls was addressed<br><i>Cross-sectional study</i> - If applicable, describe analytical methods taking account of sampling strategy<br>(e) Describe any sensitivity analyses | (a) – (e) Page 10: lines 191 - 196                                                                                                                                                                                                                           |                                                                    |
| 32<br>33<br>34<br>35<br>36<br>37<br>38<br>39<br>40<br>41<br>42                                                                             | Data access and cleaning methods |            | ..                                                                                                                                                                                                                                                                                                                                                                                                                                                                                                                                                                   | RECORD 12.1: Authors should describe the extent to which the investigators had access to the database population used to create the study population.<br><br>RECORD 12.2: Authors should provide information on the data cleaning methods used in the study. | 12.1: Page 9, lines 184 – 189<br><br>12.2: Page 9, lines 184 - 189 |
| 43<br>44<br>45                                                                                                                             | Linkage                          |            | ..                                                                                                                                                                                                                                                                                                                                                                                                                                                                                                                                                                   | RECORD 12.3: State whether the study included person-level, institutional-                                                                                                                                                                                   | 12.3: Not applicable                                               |

1  
2  
3  
4  
5  
6  
7  
8  
9  
10  
11  
12  
13  
14  
15  
16  
17  
18  
19  
20  
21  
22  
23  
24  
25  
26  
27  
28  
29  
30  
31  
32  
33  
34  
35  
36  
37  
38  
39  
40  
41  
42  
43  
44  
45  
46  
47  
48  
49

|                  |    |                                                                                                                                                                                                                                                                                                                                                 |                                                                              |                                                                                                                                                                                                                                                                                                                    |                                                      |
|------------------|----|-------------------------------------------------------------------------------------------------------------------------------------------------------------------------------------------------------------------------------------------------------------------------------------------------------------------------------------------------|------------------------------------------------------------------------------|--------------------------------------------------------------------------------------------------------------------------------------------------------------------------------------------------------------------------------------------------------------------------------------------------------------------|------------------------------------------------------|
|                  |    |                                                                                                                                                                                                                                                                                                                                                 |                                                                              | level, or other data linkage across two or more databases. The methods of linkage and methods of linkage quality evaluation should be provided.                                                                                                                                                                    |                                                      |
| <b>Results</b>   |    |                                                                                                                                                                                                                                                                                                                                                 |                                                                              |                                                                                                                                                                                                                                                                                                                    |                                                      |
| Participants     | 13 | (a) Report the numbers of individuals at each stage of the study ( <i>e.g.</i> , numbers potentially eligible, examined for eligibility, confirmed eligible, included in the study, completing follow-up, and analysed)<br>(b) Give reasons for non-participation at each stage.<br>(c) Consider use of a flow diagram                          | (a - b) Page 6: lines 121 – 124 and page 10: lines 200<br>(c) Not applicable | RECORD 13.1: Describe in detail the selection of the persons included in the study ( <i>i.e.</i> , study population selection) including filtering based on data quality, data availability and linkage. The selection of included persons can be described in the text and/or by means of the study flow diagram. | 13.1: Page 6: lines 121 – 124 and page 10: lines 200 |
| Descriptive data | 14 | (a) Give characteristics of study participants ( <i>e.g.</i> , demographic, clinical, social) and information on exposures and potential confounders<br>(b) Indicate the number of participants with missing data for each variable of interest<br>(c) <i>Cohort study</i> - summarise follow-up time ( <i>e.g.</i> , average and total amount) | (a) Page 9: lines 199 – 203<br>(b) Table 1<br>(c) Not applicable             |                                                                                                                                                                                                                                                                                                                    |                                                      |
| Outcome data     | 15 | <i>Cohort study</i> - Report numbers of outcome events or summary measures over time<br><i>Case-control study</i> - Report numbers in each exposure category, or summary measures of exposure<br><i>Cross-sectional study</i> - Report numbers of outcome events or summary measures                                                            | Page 9 & 10, lines 205 – 235 and Tables 1 - 4                                |                                                                                                                                                                                                                                                                                                                    |                                                      |
| Main results     | 16 | (a) Give unadjusted estimates                                                                                                                                                                                                                                                                                                                   | (a – c): Main results                                                        |                                                                                                                                                                                                                                                                                                                    |                                                      |

|                                                                               |                   |                                                                                                                                                                                                                                                                                                                                                                                   |                                                                                                                                                                            |                          |                                                                                                                                                                                                                                                                                                          |
|-------------------------------------------------------------------------------|-------------------|-----------------------------------------------------------------------------------------------------------------------------------------------------------------------------------------------------------------------------------------------------------------------------------------------------------------------------------------------------------------------------------|----------------------------------------------------------------------------------------------------------------------------------------------------------------------------|--------------------------|----------------------------------------------------------------------------------------------------------------------------------------------------------------------------------------------------------------------------------------------------------------------------------------------------------|
| 1<br>2<br>3<br>4<br>5<br>6<br>7<br>8<br>9<br>10<br>11<br>12<br>13<br>14<br>15 |                   | and, if applicable, confounder-adjusted estimates and their precision (e.g., 95% confidence interval). Make clear which confounders were adjusted for and why they were included<br>(b) Report category boundaries when continuous variables were categorized<br>(c) If relevant, consider translating estimates of relative risk into absolute risk for a meaningful time period | section                                                                                                                                                                    |                          |                                                                                                                                                                                                                                                                                                          |
| 16<br>17<br>18<br>19                                                          | Other analyses    | 17                                                                                                                                                                                                                                                                                                                                                                                | Report other analyses done—e.g., analyses of subgroups and interactions, and sensitivity analyses                                                                          | Not applicable           |                                                                                                                                                                                                                                                                                                          |
| 20                                                                            | <b>Discussion</b> |                                                                                                                                                                                                                                                                                                                                                                                   |                                                                                                                                                                            |                          |                                                                                                                                                                                                                                                                                                          |
| 21<br>22<br>23<br>24<br>25<br>26<br>27<br>28<br>29<br>30<br>31<br>32<br>33    | Key results       | 18                                                                                                                                                                                                                                                                                                                                                                                | Summarise key results with reference to study objectives                                                                                                                   | Page 11: lines 238 - 242 |                                                                                                                                                                                                                                                                                                          |
| 34<br>35<br>36<br>37<br>38<br>39<br>40<br>41                                  | Limitations       | 19                                                                                                                                                                                                                                                                                                                                                                                | Discuss limitations of the study, taking into account sources of potential bias or imprecision. Discuss both direction and magnitude of any potential bias                 | Page 12: Lines 269 - 281 | RECORD 19.1: Discuss the implications of using data that were not created or collected to answer the specific research question(s). Include discussion of misclassification bias, unmeasured confounding, missing data, and changing eligibility over time, as they pertain to the study being reported. |
| 42<br>43<br>44<br>45                                                          | Interpretation    | 20                                                                                                                                                                                                                                                                                                                                                                                | Give a cautious overall interpretation of results considering objectives, limitations, multiplicity of analyses, results from similar studies, and other relevant evidence | Page 12: Lines 283 - 298 |                                                                                                                                                                                                                                                                                                          |
| 46<br>47<br>48<br>49                                                          | Generalisability  | 21                                                                                                                                                                                                                                                                                                                                                                                | Discuss the generalisability (external validity) of the study results                                                                                                      | Page 14: lines 300 - 313 |                                                                                                                                                                                                                                                                                                          |

1  
2  
3  
4  
5  
6  
7  
8  
9  
10  
11  
12  
13  
14  
15  
16  
17  
18  
19  
20  
21  
22  
23  
24  
25  
26  
27  
28  
29  
30  
31  
32  
33  
34  
35  
36  
37  
38  
39  
40  
41  
42  
43  
44  
45  
46  
47  
48  
49

| Other Information                                         |    |                                                                                                                                                               |                    |                                                                                                                                                          |      |
|-----------------------------------------------------------|----|---------------------------------------------------------------------------------------------------------------------------------------------------------------|--------------------|----------------------------------------------------------------------------------------------------------------------------------------------------------|------|
| Funding                                                   | 22 | Give the source of funding and the role of the funders for the present study and, if applicable, for the original study on which the present article is based | Page 15: lines 338 |                                                                                                                                                          |      |
| Accessibility of protocol, raw data, and programming code |    | ..                                                                                                                                                            |                    | RECORD 22.1: Authors should provide information on how to access any supplemental information such as the study protocol, raw data, or programming code. | 22.1 |

\*Reference: Benchimol EI, Smeeth L, Guttman A, Harron K, Moher D, Petersen I, Sørensen HT, von Elm E, Langan SM, the RECORD Working Committee. The REporting of studies Conducted using Observational Routinely-collected health Data (RECORD) Statement. *PLoS Medicine* 2015; in press.

\*Checklist is protected under Creative Commons Attribution ([CC BY](https://creativecommons.org/licenses/by/4.0/)) license.

# BMJ Open

**Does attendance at a specialist antenatal clinic improve clinical outcomes in women with Class III obesity compared to standard care? : a retrospective case-note analysis.**

|                                 |                                                                                                                                                                                                                                                                                                                                                                                                                           |
|---------------------------------|---------------------------------------------------------------------------------------------------------------------------------------------------------------------------------------------------------------------------------------------------------------------------------------------------------------------------------------------------------------------------------------------------------------------------|
| Journal:                        | <i>BMJ Open</i>                                                                                                                                                                                                                                                                                                                                                                                                           |
| Manuscript ID                   | bmjopen-2016-015218.R1                                                                                                                                                                                                                                                                                                                                                                                                    |
| Article Type:                   | Research                                                                                                                                                                                                                                                                                                                                                                                                                  |
| Date Submitted by the Author:   | 23-Jan-2017                                                                                                                                                                                                                                                                                                                                                                                                               |
| Complete List of Authors:       | Denison, Fiona; The University of Edinburgh , MRC Centre for Reproductive Health<br>MacGregor, Heather; University of Edinburgh Queen's Medical Research Institute<br>Stirrat, Laura; University of Edinburgh Queen's Medical Research Institute<br>Stevenson, Kerrie; University of Edinburgh Queen's Medical Research Institute<br>Norman, Jane; University of Edinburgh<br>Reynolds, Rebecca; University of Edinburgh, |
| <b>Primary Subject Heading</b>: | Obstetrics and gynaecology                                                                                                                                                                                                                                                                                                                                                                                                |
| Secondary Subject Heading:      | Health services research                                                                                                                                                                                                                                                                                                                                                                                                  |
| Keywords:                       | Obesity, Stillbirth, low birthweight                                                                                                                                                                                                                                                                                                                                                                                      |
|                                 |                                                                                                                                                                                                                                                                                                                                                                                                                           |

SCHOLARONE™  
Manuscripts

Only

Specialist clinic improves outcomes in maternal obesity

1 Does attendance at a specialist antenatal clinic improve clinical outcomes in women with Class III obesity  
2  
3 compared to standard care? a retrospective case-note analysis.  
4

5  
6  
7  
8  
9  
10  
11  
12  
13  
14  
15  
16  
17  
18  
19  
20  
21  
22  
23  
24  
25  
26  
27  
28  
29  
30  
31  
32  
33  
34  
35  
36  
37  
38  
39  
40  
41  
42  
43  
44  
45  
46  
47  
48  
49  
50  
51  
52  
53  
54  
55  
56  
57  
58  
59  
60

Denison FC\*, MacGregor H, Stirrat LI, Stevenson, KJ, Norman JE, Reynolds RM

Denison FC: Reader and Honorary Consultant in Maternal and Fetal Health, Tommy's Centre for  
Maternal and Fetal Health, University of Edinburgh MRC Centre for Reproductive Health, Queen's  
Medical Research Institute, 47 Little France Crescent, Edinburgh, EH16 4TY

MacGregor H: Medical Student, University of Edinburgh

Stirrat LI: Clinical Research Fellow, Tommy's Centre for Maternal and Fetal Health, University of  
Edinburgh MRC Centre for Reproductive Health, Queen's Medical Research Institute, 47 Little France  
Crescent, Edinburgh, EH16 4TY

Stevenson, KJ: Medical Student, University of Edinburgh

Norman JE: Professor of Maternal and Fetal Health, Tommy's Centre for Maternal and Fetal Health,  
University of Edinburgh MRC Centre for Reproductive Health, Queen's Medical Research Institute, 47  
Little France Crescent, Edinburgh, EH16 4TY

Reynolds RM: Professor of Metabolic Medicine, British Heart Foundation Centre for Cardiovascular  
Science, Queen's Medical Research Institute, 47 Little France Crescent, Edinburgh, EH16 4TY

Corresponding author:

Dr Fiona Denison

Tommy's Centre for Maternal and Fetal Health

1 28 Specialist clinic improves outcomes in maternal obesity  
2 MRC Centre for Reproductive Health

3 29 Queen's Medical Research Institute

4  
5 30 Edinburgh

6  
7 31 0131 242 6449

8  
9  
10 32 [Fiona.Denison@ed.ac.uk](mailto:Fiona.Denison@ed.ac.uk)

11  
12 33

13  
14  
15  
16  
17  
18  
19  
20  
21  
22  
23  
24  
25  
26  
27  
28  
29  
30  
31  
32  
33  
34  
35  
36  
37  
38  
39  
40  
41  
42  
43  
44  
45  
46  
47  
48  
49  
50  
51  
52  
53  
54  
55  
56  
57  
58  
59  
60

For peer review only

Specialist clinic improves outcomes in maternal obesity

Abstract

35

Objectives: To determine whether attendance at a specialised multidisciplinary antenatal clinic for women with Class III obesity ( $\text{BMI} > 40 \text{ kg/m}^2$ ) is associated with improved clinical outcomes compared to standard antenatal care

Design: Retrospective cohort study using routinely collected data from electronic patient record

Setting: Community and hospital based antenatal care

Participants: Women with a singleton pregnancy with Class III obesity booked for antenatal care and delivered in one of two hospitals in NHS Lothian, Scotland, UK between 2008 – 2014. Maternal and offspring outcomes were compared in women who attended a specialised obesity clinic ( $n=511$ ) compared to standard antenatal care ( $n=502$ ).

Main Outcome Measures: Included stillbirth, low birthweight, gestational diabetes, induction of labour and caesarean section.

Results: Compared to standard care, women receiving specialist care were less likely to have a stillbirth (Odds Ratio (OR), 95% Confidence Interval (CI) 0.12, 0.06-0.97) and a low birthweight baby (OR, 95% CI 0.57, 0.33-0.99) and more likely to be screened for (100% vs 73.6%;  $p < 0.001$ ) and diagnosed with (26.0% vs 12.5%;  $p < 0.001$ ) gestational diabetes, to require induction of labour (38.4% vs 29.9%,  $p = 0.009$ ), an elective (20.3% vs 17.7%;  $p < 0.001$ ) and emergency (23.9% vs 20.3%;  $p < 0.001$ ) caesarean section and attend antenatal triage one or more times during pregnancy (77.7% vs 53.1%;  $p < 0.001$ ).

Women attending the specialist clinic had a higher BMI ( $44.5 \text{ kg/m}^2$  (4.3) vs  $43.2 \text{ kg/m}^2$  (3.1);  $p < 0.001$ ) and were more likely to be nulliparous (46.0% vs 24.9%;  $p < 0.001$ ). There were no other differences in maternal demographic or maternal and offspring outcomes between groups.



1 Specialist clinic improves outcomes in maternal obesity  
2 61

3 62 Conclusions: Attendance at a specialised antenatal clinic for obesity is associated with reduced rates of  
4  
5 63 stillbirth and low birthweight and improved detection of gestational diabetes. The improvement in clinical  
6  
7 64 outcomes is associated with an increase in healthcare attendance to obstetric triage and clinical  
8  
9 65 interventions including induction of labour and caesarean section.  
10  
11 66

12  
13  
14 67 Keywords

15  
16 68 Obesity, stillbirth, low birthweight  
17  
18 69

19  
20  
21  
22  
23  
24  
25  
26  
27  
28  
29  
30  
31  
32  
33  
34  
35  
36  
37  
38  
39  
40  
41  
42  
43  
44  
45  
46  
47  
48  
49  
50  
51  
52  
53  
54  
55  
56  
57  
58  
59  
60

For peer review only

Specialist clinic improves outcomes in maternal obesity

1 70

2 71 Article Summary - Strengths and limitations of this study

3 72

4

5 73

• This study compares maternal and offspring outcomes in women with Class III obesity who attend a specialist obesity antenatal clinic compared to those who received standard care

8 74

9

10 75

• A strength of our study is that we were able to compare important clinical outcomes in women and offspring such as stillbirth and low birthweight.

12 76

13

14 77

• The use of routinely collected clinical data means that our results are relevant to clinical practice in which multiple different care pathways exist.

17 78

18

19 79

• The stillbirth findings and causality need to be interpreted with caution due to the small sample size and attenuation of findings in adjusted analyses.

22 80

23

24 81

• As a retrospective cohort study using routinely collected data from electronic patient record, results must be interpreted with caution because of potential bias from confounding factors.

26 82

27

28 83

29

30 84

31

32 85

33

34

35

36

37

38

39

40

41

42

43

44

45

46

47

48

49

50

51

52

53

54

55

56

57

58

59

60

Specialist clinic improves outcomes in maternal obesity

86 **Introduction**

87 Maternal obesity is the most common co-morbidity of pregnancy. In the UK, approximately 20% of  
88 pregnant women are obese and 2% have very severe obesity (Class III obesity, body mass index BMI  $\geq$   
89 40 kg/m<sup>2</sup>) [1]. Maternal obesity is associated with increased risks for adverse maternal and offspring  
90 health including gestational diabetes mellitus (GDM), thromboembolic and hypertensive complications,  
91 caesarean section, macrosomia and stillbirth [2-5]. Managing these complications has significant cost  
92 implications for delivery of antenatal care [2, 4] [6].

93  
94 There is recognition that obstetric management of the obese should be consultant led and involve a multi-  
95 disciplinary team to improve outcome [7, 8]. These recommendations are embedded in clinical guidelines  
96 and standards of care produced by a number of countries [8-13]. However, there is a paucity of evidence  
97 demonstrating that multidisciplinary care and adherence to guidelines results in improved maternal and  
98 offspring outcomes in maternal obesity. There is also less consensus about how multidisciplinary care  
99 should be delivered, and a concern that in areas of high obesity prevalence specialist obesity clinics are  
100 unlikely to be feasible due to cost and the numbers of women who would potentially need to be seen [13].

101  
102 Women with Class III obesity are at particularly high risk of adverse maternal and offspring outcome  
103 [14]. In 2008 we therefore set up a specialist antenatal clinic for women with Class III obesity living in  
104 Edinburgh and the surrounding Lothian area with the aim of improving maternal and offspring outcomes.  
105 At their first antenatal appointment, which is generally prior to 12 weeks gestation, women with a BMI  
106  $>40\text{kg/m}^2$  are offered referral to the specialist clinic or can choose to continue to receive standard  
107 antenatal care. We have a pan-Lothian guideline for clinical management of pregnancies in women with  
108 obesity (Class I, II and III) so that the same care pathway is offered, regardless of who or where it is  
109 delivered. All women with Class III obesity should therefore receive the same standard of care. We  
110 hypothesised that maternal and offspring outcomes would be better in women who had their antenatal  
111 care provided by a multidisciplinary specialist clinic as opposed to receiving standard antenatal care. To  
112 test this hypothesis, we undertook a retrospective case-note review of all women with a BMI  $>40\text{kg/m}^2$

1 113 Specialist clinic improves outcomes in maternal obesity  
2 who delivered in Lothian between 2008 and 2014 and compared clinical outcomes in women who  
3 114 attended for specialist antenatal care compared to those who received standard antenatal care.  
4

5 115

7 116 **Methods**

9 117

10 118 Study population

11 119

12 120 We performed a retrospective case-note review of all women with Class III obesity with a singleton  
13 121 pregnancy who booked for antenatal care and delivered in either of two hospitals in NHS Lothian trust  
14 122 between 2008 and 2014. The Simpson Centre for Reproductive Health at the Royal Infirmary of  
15 123 Edinburgh is a tertiary referral centre with more than 6,500 deliveries per annum. St John's Hospital,  
16 124 Livingston, is a district general hospital with approximately 2,600 deliveries per annum. Women were  
17 125 excluded if they had not delivered by the end of December 2014, had a multiple pregnancy (n=28), or  
18 126 booked later than 20 weeks gestation (n=18) because this meant they would have missed the gestational  
19 127 window for early screening for GDM [15]. This study was an approved by our local audit committee.  
20  
21  
22  
23  
24  
25  
26  
27  
28  
29  
30  
31  
32  
33

34 128

35 129 Clinical care pathway

36 130 Women attending the specialist clinic at the Simpson Centre for Reproductive Health, Royal Infirmary of  
37 131 Edinburgh receive multidisciplinary consultant-led care throughout pregnancy from obstetricians,  
38 132 specialist midwives, diabetologists, anaesthetists, dieticians and other specialists as clinically indicated.  
39 133 At their first appointment (~10-16 weeks gestation), women are reviewed individually by a dietician with  
40 134 specialist expertise in weight management during pregnancy and given tailored advice about healthy  
41 135 eating and weight management during pregnancy. They are advised to have early screening for GDM  
42 136 with a fasting blood glucose between 12-16 weeks and late screening using a 75g oral glucose tolerance  
43 137 test between 24-28 weeks, as per the Scottish Intercollegiate Guidelines [15]. If a woman has pre-existing  
44 138 Type 2 diabetes or is diagnosed with GDM during pregnancy, her care remains within the specialist  
45 139 clinic. At each visit, women are weighed, counselled about the maternal and offspring risks associated  
46  
47  
48  
49  
50  
51  
52  
53  
54  
55  
56  
57  
58  
59  
60

Specialist clinic improves outcomes in maternal obesity

1 140 with maternal obesity, and their blood pressure is measured with appropriate sized cuffs. Women are  
2  
3 141 commenced on 75mg aspirin if they have additional risk factors for pre-eclampsia such as a blood  
4  
5 142 pressure of >140/90 mmHg at antenatal booking or primiparity as per national guidelines [16]. All  
6  
7 143 women have postnatal thromboprophylaxis with low molecular weight heparin, with antenatal  
8  
9 144 thromboprophylaxis being commenced if additional risk factors develop [16]. Fetal growth is monitored  
10  
11 145 by serial growth scans at 28, 32 and 36 weeks. All women receive a personalised delivery plan and an  
12  
13 146 anaesthetic review in the third trimester to discuss intrapartum pain management with specific  
14  
15 147 consideration given to obesity related co-morbidities with implications for analgesia and anaesthesia.  
16  
17  
18  
19 148

20  
21 149 Women who do not attend the specialist clinic receive guideline based consultant led care in hospital  
22  
23 150 (tertiary or district general) or community based antenatal clinics. The main difference between specialist  
24  
25 151 and standard care, is that if a woman receiving standard care develops a complication she needs to attend  
26  
27 152 an additional separate specialist clinic, for example a diabetes clinic in the event she develops gestational  
28  
29 153 diabetes. For women who attend the obesity clinic, this care is centralised in a single multi-professional  
30  
31 154 clinic.  
32  
33  
34  
35

36 155  
37 156 To compare maternal and offspring outcomes by antenatal care setting, women were categorised as  
38  
39 157 'Specialist care' if they attended for two or more appointments at the specialist clinic with the first  
40  
41 158 appointment being before 20 weeks. The rationale for this was that such women would have received  
42  
43 159 early dietary advice and counselling about the importance of attending for early screening for GDM.  
44  
45 160 Women who did not attend the specialist clinic were categorised as receiving 'standard care'.  
46  
47  
48 161

49 162 Data Collection

50  
51  
52 163 Maternal and offspring data were acquired from the maternity electronic patient records database TRAK  
53  
54 164 (supplied by Intersystems), clinical biochemistry database APEX (ApexHealthware) and the neonatal unit  
55  
56 165 electronic patient records database BadgerNet (supplied by Clevermed) systems.  
57  
58  
59 166  
60

Specialist clinic improves outcomes in maternal obesity

1 167 The following data were collected from the maternal record at booking: maternal age, BMI (kg/m<sup>2</sup>),  
2  
3 168 ethnicity (white, other), parity (P0, P1, P2 or more), smoking status (current, former, never), deprivation  
4  
5 169 quintile (a postcode based Scottish Index of Multiple Deprivation from 2012 with five groups ranging  
6  
7 170 from most deprived index (1) to least deprived index (5))[17] and systolic and diastolic blood pressure  
8  
9 171 (mmHg).

10 172  
11  
12 173 Maternal outcomes collected were hypertension (pre-existing, gestational, pre-eclampsia), diabetes (pre-  
13  
14 174 existing, GDM), onset of labour (no labour, spontaneous onset, induced), delivery method (elective  
15  
16 175 caesarean, emergency caesarean, instrumental, spontaneous vaginal), blood loss at delivery and antenatal  
17  
18 176 obstetric triage attendances. The prevalence of GDM was determined according to (i) the rates of GDM  
19  
20 177 from diagnoses entered into the electronic patient record and (ii) evaluating whether blood glucose values  
21  
22 178 found on the electronic databases conferred a diagnosis of GDM. Diagnostic accuracy of GDM was  
23  
24 179 determined according to Scottish Intercollegiate Guidelines which utilised the World Health Organisation  
25  
26 180 (WHO) recommended thresholds [18] until March 2010 when updated thresholds were published based  
27  
28 181 on the International Association of the Diabetes and Pregnancy Study Groups [19].  
29  
30 182

31  
32 183 Offspring outcomes collected were gender, birthweight, birthweight centile [20], macrosomia (defined as  
33  
34 184 a birthweight  $\geq 4000$ g), low birthweight (defined as a birthweight  $\leq 2500$ g), gestation of delivery, preterm  
35  
36 185 birth (defined as birth  $< 259$  days gestation) and outcome (livebirth, stillbirth).  
37  
38 186

39  
40 187 All data were anonymised with personal identifiers removed before analysis. To maximize accuracy and  
41  
42 188 to minimise missing data all records were reviewed by HM and LS, glucose data was reviewed by KS and  
43  
44 189 LS with any discrepancies reviewed by FD, RR. For stillbirths, a perinatal pathologist examined placental  
45  
46 190 pathology as is routine clinical practice. HM and LS independently identified risk factors and categorised  
47  
48 191 the likely causality of the stillbirths. Stillbirth causation was checked and verified by a third investigator  
49  
50 192 (FD). All investigators were blinded to whether a woman received 'specialist' or 'standard' care until risk  
51  
52 193 factors and likely causality was agreed for all stillbirths.  
53  
54  
55  
56  
57  
58  
59  
60

Specialist clinic improves outcomes in maternal obesity

1 194

2

3 195

Statistical Analysis

4

5 196

Data were analysed using the Statistical Package for the Social Sciences (SPSS) Version 21. Differences

6

7 197

in the characteristics and clinical outcomes between the women who attended the specialist obesity clinic

8

9 198

and those who received standard care were tested using the student's t-test if the variable was continuous

10

11 199

or the chi-squared test for categorical variables. Logistic regression was used to adjust for BMI and

12

13 200

parity. A p-value  $<0.05$  was considered statistically significant.

14

15 201

16

17 202

Results

18

19 203

Demographics

20

21 204

Maternal demographics are demonstrated in Table 1. Compared to standard care women who attended the

22

23 205

specialist clinic had a higher BMI, and were more likely to be primiparous. There were no differences in

24

25 206

age, ethnicity, smoking status, systolic or diastolic blood pressure at booking between attenders and non-

26

27 207

attenders. There was a trend towards deprivation levels being different in those attending for specialist

28

29 208

compared to standard care with more women from both the least and most deprived attending specialist

30

31 209

care.

32

33 210

34

35 211

Maternal outcomes

36

37 212

Maternal outcomes are demonstrated in Table 2. After excluding women with pre-existing Type 1 and

38

39 213

Type 2 diabetes, all women who attended the specialist clinic had a screening test with sufficient

40

41 214

information being collected to confirm or exclude a diagnosis of GDM. In contrast, 26.4% (128/484) of

42

43 215

those receiving standard care either had no screening test for GDM or insufficient information was

44

45 216

collected for a diagnosis of GDM to be made. The clinical diagnosis of GDM from the patient record

46

47 217

matched the diagnosis from blood glucose levels in all women who attended the specialist clinic. In

48

49 218

contrast, in those receiving standard care, when the notes and actual blood glucose values were compared,

50

51 219

the 'wrong' diagnosis was made in 17 women. One woman was incorrectly diagnosed with GDM when

52

53 220

her screening test for GDM was normal. A further 16 woman had a positive diagnostic test for GDM

54

55

56

57

58

Specialist clinic improves outcomes in maternal obesity

221 according to glucose values obtained during a glucose tolerance test but the diagnosis was missed and

222 these women were incorrectly labelled as not having GDM (and did not therefore receive treatment).

223

224 Compared to those receiving standard care, women who attended the specialist clinic were more likely to

225 have their labour induced, to have a caesarean or instrumental vaginal delivery. Specialist clinic attenders

226 had a higher blood loss at delivery than those receiving standard care even after adjusting for mode of

227 delivery, BMI, age and parity ( $p=0.02$ ). They were also more likely to attend obstetric triage one or more

228 times during pregnancy. Rates of pre-existing chronic hypertension and hypertensive complications

229 (gestational hypertension and pre-eclampsia) were low in both attenders and non-attenders. Rates of Type

230 2 diabetes were higher in non-attenders compared to attenders.

231

232 Offspring outcomes

233 The clinical details for the offspring outcomes are demonstrated in Table 3. Compared to standard care,

234 women attending for specialist care were less likely to have a stillbirth (Odds Ratio (OR), 95%

235 Confidence Interval (CI) 0.12, 0.06-0.97) and a low birthweight baby (OR, 95% CI 0.57, 0.33-0.99). The

236 lower stillbirth outcomes in women who attended for specialist care were attenuated in analyses adjusting

237 for BMI and parity (adjusted OR (AOR), 95% CI 0.14, 0.02-1.17) but the lower risk of having a low

238 birthweight baby was strengthened in adjusted analyses (AOR, 95% CI 0.52, 0.29-0.93). The clinical

239 details of the women who had a stillbirth are demonstrated in Table 4. In women attending for standard

240 care, an additional risk factor for stillbirth was identified in 7 women and a probable cause for stillbirth

241 was identified in all 8 women. No additional risk factors or cause was identified in the one woman who

242 had a stillbirth who attended the specialist clinic.

243

## 244 Discussion

245 In this retrospective case-note review, we demonstrated that women with Class III obesity who attended a

246 specialist multidisciplinary antenatal clinic were less likely to have a stillbirth and low birthweight infant

247 and more likely to be tested, correctly diagnosed with and treated for GDM, and to have an induction of



Specialist clinic improves outcomes in maternal obesity

248 labour, caesarean section and higher blood loss at delivery compared to those receiving standard antenatal  
249 care. These differences in outcomes were accompanied by increased attendance at obstetric triage.

250

## 251 Main Findings

252 A key study finding was that rates of stillbirth and low birthweight were lower in women who attended  
253 the clinic compared to those who did. Compared to standard care, women who attended the specialist  
254 clinic had a higher BMI, and were more likely to be primiparous. Given that primiparity and higher BMI  
255 are independently associated with increased risk of stillbirth and low birthweight [21-23], we expected  
256 that rates of stillbirth and low birthweight would be higher in women receiving specialist as compared to  
257 standard care. However, we found the converse to be the case, with fewer stillborn and low birthweight  
258 babies being born to women attending the specialist clinic, even after adjusting for parity and BMI. We  
259 are uncertain why rates of low birthweight are lower in women attending the specialist clinic are lower  
260 since there are no differences in the length of gestation or frequency of preterm birth.

261

262 The stillbirth rate in women who attended the specialist clinic was 2 per 1000 compared to a rate of 7 per  
263 1000 for women with a BMI>40kg/m<sup>2</sup> who delivered in Scotland in 2011 - 2012 [24]. To validate this  
264 finding, three investigators who were blinded to whether women received specialist or standard care  
265 independently checked the stillbirth data. It was striking that additional risk factors were identified in 7  
266 and a cause for stillbirth identified in all 8 women who received standard care and who had a stillbirth but  
267 no additional risk factors or cause was identified in the one woman who had a stillbirth who attended the  
268 specialist clinic. We accept that rates of unexplained stillbirth are generally reported as being 20 – 25%  
269 which is much higher than what we found in our study. We therefore acknowledge the stillbirth findings  
270 and causality need to be interpreted with caution due to the small sample size and attenuation of findings  
271 in adjusted analyses. However it is tempting to speculate that the continuity of care together with the  
272 education of women by the multidisciplinary clinic team raised increased awareness of the importance of  
273 risk factors such as reduced fetal movements and this may have led to them presenting earlier to obstetric  
274 triage and being induced prior to stillbirth occurring. Future studies such as the AFFIRM clinical trial

Specialist clinic improves outcomes in maternal obesity  
(NCTT01777022, due to complete in 2017) are designed to address this in the general antenatal

population.

#### Strengths and Limitations

A strength of our study is that we were able to compare important clinical outcomes in women and offspring such as stillbirth. We also used routinely collected clinical data meaning that our results are relevant to clinical practice in which multiple different care pathways exist. We accept that a limitation of our study is that this was a retrospective case-note review and our sample size was therefore limited by the study population. For the majority of data fields, other than smoking status (43.8% missing), there was a relatively low proportion of missing data. For the smoking variable, this was due to smoking status not being a mandatory field for recording on the electronic clinical record prior to 2012. The study was also not randomised, so women could choose whether to attend the specialist clinic. However, apart from differences in maternal BMI (albeit a small difference of uncertain clinical significance) and primiparity and a trend towards differences in deprivation status between women who attended for specialist compared to standard care, all other demographic factors were comparable between groups. Given that the clinical outcomes were better in women attending the specialist clinic who were arguably at higher risk than those attending standard care due to their higher BMI and more likely to be primiparous, we believe that our finding that multidisciplinary care improves clinical outcomes in pregnant women with Class III obesity compared to standard care is clinically important.

#### Interpretation

In other general and high-risk populations, pregnancy outcomes tend to be worse in women who either under- or do not attend for any antenatal care [25]. However, although we categorised women into women who attended for specialist and standard care this was only in relation to how their antenatal care was organised and not whether they did or did not attend for any antenatal care. In 1993, the landmark Changing Childbirth Report [26], which was built on the 1992 Winterton Report, reversed the official policy that hospital is always the safest place for birth and emphasised the importance of maternal choice,

Specialist clinic improves outcomes in maternal obesity

1 302 control and continuity of carer for women. These recommendations, which were made over 20 years ago  
2  
3 303 are still as relevant today, and frame the rhetoric and delivery of antenatal care across the UK [27-30]. In  
4  
5 304 Lothian, all women receiving community-led care have a named midwife who coordinates their care. This  
6  
7 305 midwife is part of a community team which has a defined case-load. This model ensures that there is  
8  
9 306 continuity of care for a woman at both the individual midwife and midwifery team-level. If a woman is  
10  
11 307 deemed high risk (such as would be the case in women with Class III obesity), she is also designated a  
12  
13 308 named Consultant to oversee her care. Despite this model of continuity of care, our study demonstrates  
14  
15 309 that maternal and offspring outcomes are better in women who attend a hospital based specialist clinic  
16  
17 310 compared to those who receive standard antenatal care.  
18  
19 311

20  
21 312 Although specialist clinics have been advocated as a way of improving maternal and offspring outcomes,  
22  
23 313 there is currently a paucity of evidence from randomised controlled trials about the benefits and harms of  
24  
25 314 specialist antenatal clinics compared with standard antenatal care for women [31]. For example,  
26  
27 315 systematic reviews of randomised controlled trials have concluded that there is currently limited  
28  
29 316 information to assess the role of specialist antenatal clinics for women with a multiple pregnancy [32]  
30  
31 317 and no clear evidence that specialist clinics reduce the number of preterm births [33]. Given that the  
32  
33 318 antenatal care pathway followed was the same in women who attended the specialist clinic and those who  
34  
35 319 received standard care, it is not clear why maternal and offspring outcomes were better in women who  
36  
37 320 attended the specialist clinic. A recent systematic review by Sandall et al. highlighted the importance of  
38  
39 321 continuity of care, demonstrating that pregnant women receiving midwife-led continuity models of care  
40  
41 322 had at least comparable clinical outcomes and were likely to experience less intervention [34]. It is  
42  
43 323 therefore plausible that the continuity of care that the specialist multidisciplinary team provided enabled  
44  
45 324 compromised pregnancies to be identified more accurately and interventions such as induction of labour  
46  
47 325 to be targeted more appropriately compared to those women receiving standard care. It is also possible  
48  
49 326 that staff providing standard antenatal care have less experience of Class III obesity and poorer access to  
50  
51 327 appropriate facilities and equipment which may have adversely impacted their ability to provide optimal  
52  
53 328 antenatal care to these high risk women.  
54  
55  
56  
57  
58  
59  
60

Specialist clinic improves outcomes in maternal obesity

1 329

2

3 330 Conclusion

4

5 331 In summary, our study demonstrates that attendance at a multidisciplinary specialist antenatal clinic

6

7 332 improves maternal and offspring outcomes in women with Class III obesity. This challenges current

8

9 333 recommendations that women with very Class III obesity can be effectively managed outside a specialist

10

11 334 service. Further research is needed to identify the most appropriate and economic model of care for

12

13 335 women with Class III obesity to optimise maternal and offspring outcomes.

14

15 336

16

17 337 Acknowledgements

18

19 338 We would like to acknowledge Mr Allyn Dick for assistance in extracting the clinical data from maternity

20

21 339 TRAK.

22

23 340

24

25 341 Copyright

26

27 342 The Corresponding Author has the right to grant on behalf of all authors and does grant on behalf of all

28

29 343 authors, [a worldwide licence](#) to the Publishers and its licensees in perpetuity, in all forms, formats and

30

31 344 media (whether known now or created in the future), to i) publish, reproduce, distribute, display and store

32

33 345 the Contribution, ii) translate the Contribution into other languages, create adaptations, reprints, include

34

35 346 within collections and create summaries, extracts and/or, abstracts of the Contribution, iii) create any

36

37 347 other derivative work(s) based on the Contribution, iv) to exploit all subsidiary rights in the Contribution,

38

39 348 v) the inclusion of electronic links from the Contribution to third party material where-ever it may be

40

41 349 located; and, vi) licence any third party to do any or all of the above.

42

43 350

44

45 351 Disclosure of Interests

46

47 352 The authors have no interests to disclose.

48

49 353

50

51 354 Contribution to authorship

52

53

54

55

56

57

58

59

60

Specialist clinic improves outcomes in maternal obesity

355 FD and RR conceived the study and drafted the paper. FD, HM, LS, KS, JN and RR designed the study.

356 FD, HM, LS, KS and RR acquired and analysed the data. All authors interpreted the data, revised the

357 paper critically for important intellectual content and approved the final version.

358

359 Details of Ethics Approval

360 This study was approved by our local audit committee.

361

362 Data Sharing

363 No additional data available

364

365 Funding

366 We acknowledge funding from Tommy's the Baby Charity. This work was carried out in the MRC

367 Centre for Reproductive Health: Centre Grant MRC MR/N022556/1

## Specialist clinic improves outcomes in maternal obesity

368 References

1. Report, C.f.M.a.C.E., *Maternal obesity in the UK: findings from a national project*, in *Centre for Maternal and Child Enquiries* 2010: Chiltern Court, 188 Baker Street, London, NW1 5SD.
2. Denison, F.C., et al., *Association between maternal body mass index during pregnancy, short-term morbidity, and increased health service costs: a population-based study*. *BJOG*, 2014. **121**(1): p. 72-81; discussion 82.
3. Denison, F.C. and C. Chiswick, *Improving pregnancy outcome in obese women*. *Proc Nutr Soc*, 2011. **70**(4): p. 457-64.
4. Denison, F.C., et al., *Increased Maternal BMI is associated with an Increased Risk of Minor Complications during Pregnancy With Consequent Cost Implications*. *BJOG*, 2009. **116**(11): p. 1467-72.
5. Reynolds, R.M., et al., *Maternal and Offspring Outcomes of Pregnancies associated with Severe Obesity: Study design and preliminary data from the Hormones and Inflammation in Obese Pregnancy Study*. *J of Developmental Origins of Health and Disease* 2009: p. P7A-318.
6. Morgan, K.L., et al., *Obesity in pregnancy: a retrospective prevalence-based study on health service utilisation and costs on the NHS*. *BMJ Open*, 2014. **4**(2): p. e003983.
7. Ghaffari, N., S.K. Srinivas, and C.P. Durnwald, *The multidisciplinary approach to the care of the obese parturient*. *Am J Obstet Gynecol*, 2015. **213**(3): p. 318-25.
8. Jarvie, E. and J.E. Ramsay, *Obstetric management of obesity in pregnancy*. *Semin Fetal Neonatal Med*, 2010. **15**(2): p. 83-8.
9. *ACOG Committee Opinion No. 650: Physical Activity and Exercise During Pregnancy and the Postpartum Period*. *Obstet Gynecol*, 2015. **126**(6): p. e135-42.
10. *ACOG Practice Bulletin No 156: Obesity in Pregnancy*. *Obstet Gynecol*, 2015. **126**(6): p. e112-26.
11. Alavi, N., et al., *Comparison of national gestational weight gain guidelines and energy intake recommendations*. *Obes Rev*, 2013. **14**(1): p. 68-85.
12. Fitzsimons, K.J. and J. Modder, *Setting maternity care standards for women with obesity in pregnancy*. *Semin Fetal Neonatal Med*, 2010. **15**(2): p. 100-7.
13. *RCOG, Management of Women with Obesity in Pregnancy in RCOG CMACE/RCOG*, Editor 2010, CMACE/RCOG: London.
14. Lutsiv, O., et al., *The effects of morbid obesity on maternal and neonatal health outcomes: a systematic review and meta-analyses*. *Obes Rev*, 2015. **16**(7): p. 531-46.
15. Network, S.I.G., *Management of Diabetes: A national clinical guideline*, 2014, Scottish Intercollegiate Guidelines Network: Edinburgh.
16. NICE, *Hypertension in pregnancy: diagnosis and management: CG107*, 2011.
17. Government, T.S., *Scottish Index of Multiple Deprivation 2012. A National Statistics Publication for Scotland*, in *National Statistics* 2012, The Scottish Government.
18. (SIGN), S.I.G.N., *Management of Diabetes. SIGN publication no.55*, 2001, SIGN: Edinburgh.
19. International Association of, D., et al., *International association of diabetes and pregnancy study groups recommendations on the diagnosis and classification of hyperglycemia in pregnancy*. *Diabetes Care*, 2010. **33**(3): p. 676-82.
20. Bonellie, S., et al., *Centile charts for birthweight for gestational age for Scottish singleton births*. *BMC Pregnancy Childbirth*, 2008. **8**: p. 5.
21. Aune, D., et al., *Maternal body mass index and the risk of fetal death, stillbirth, and infant death: a systematic review and meta-analysis*. *JAMA*, 2014. **311**(15): p. 1536-46.
22. Flenady, V., et al., *Stillbirths: the way forward in high-income countries*. *Lancet*, 2011. **377**(9778): p. 1703-17.
23. Shah, P.S. and L.B.W.P.T.b. Knowledge Synthesis Group on Determinants of, *Parity and low birth weight and preterm birth: a systematic review and meta-analyses*. *Acta Obstet Gynecol Scand*, 2010. **89**(7): p. 862-75.
24. ISD. *Stillbirth and Infant Deaths*. 2016 [cited 2016 14th November, 2016]; Available from: <http://www.isdscotland.org/health-Topics/Maternity-and-Births/Stillbirth-and-Infant-Deaths/>.



## Specialist clinic improves outcomes in maternal obesity

- 1 420 25. Raatikainen, K., N. Heiskanen, and S. Heinonen, *Under-attending free antenatal care is*  
2 421 *associated with adverse pregnancy outcomes*. BMC Public Health, 2007. 7: p. 268.
- 3 422 26. Health, D.o., *Changing childbirth. Part 1: report of the Expert Maternity Group.*, D.o. Health,  
4 423 Editor 1993, Department of Health: London.
- 5 424 27. Health, D.o., *National Service Framework for children, young people and maternity services:*  
6 425 *maternity services*, 2004, Department of Health: London.
- 7 426 28. Health, D.o., *Maternity matters: choice, access and continuity of care in a safe service*, 2007,  
8 427 Department of Health: London.
- 9 428 29. Government, S. *A Refreshed Framework for Maternity Care in Scotland*. 2011 [cited 2016 24th  
10 429 October, 2016]; Available from: <http://www.gov.scot/resource/doc/337644/0110854.pdf>.
- 11 430 30. *Better Births - Improving outcomes of maternity services in England*, N.M. Review, Editor 2016.
- 12 431 31. Dodd, J.M. and C.A. Crowther, *Specialised antenatal clinics for women with a multiple*  
13 432 *pregnancy for improving maternal and infant outcomes*. Cochrane Database Syst Rev, 2012(8): p.  
14 433 CD005300.
- 15 434 32. Dodd, J.M., T. Dowswell, and C.A. Crowther, *Specialised antenatal clinics for women with a*  
16 435 *multiple pregnancy for improving maternal and infant outcomes*. Cochrane Database Syst Rev,  
17 436 2015(11): p. CD005300.
- 18 437 33. Whitworth, M., et al., *Specialised antenatal clinics for women with a pregnancy at high risk of*  
19 438 *preterm birth (excluding multiple pregnancy) to improve maternal and infant outcomes*. Cochrane  
20 439 Database Syst Rev, 2011(9): p. CD006760.
- 21 440 34. Sandall, J., et al., *Midwife-led continuity models versus other models of care for childbearing*  
22 441 *women*. Cochrane Database Syst Rev, 2016. 4: p. CD004667.
- 23 442
- 24 443
- 25 444
- 26
- 27
- 28
- 29
- 30
- 31
- 32
- 33
- 34
- 35
- 36
- 37
- 38
- 39
- 40
- 41
- 42
- 43
- 44
- 45
- 46
- 47
- 48
- 49
- 50
- 51
- 52
- 53
- 54
- 55
- 56
- 57
- 58
- 59
- 60

## Specialist clinic improves outcomes in maternal obesity

**Table 1: Demographics of population**

|                                              | Specialist<br>(n=511) | Standard<br>(n=502) | P value |
|----------------------------------------------|-----------------------|---------------------|---------|
| Age (years; mean (SD))                       | 29.8 (5.4)            | 29.3 (5.5)          | 0.11    |
| BMI (kg/m <sup>2</sup> ; mean (SD))          | 44.5 (4.3)            | 43.2 (3.1)          | <0.001  |
| Ethnicity (n (%))*                           |                       |                     | 0.35    |
| White                                        | 441 (94.6%)           | 432 (92.9%)         |         |
| Other                                        | 25 (5.4%)             | 33 (7.1%)           |         |
| Parity (n (%))                               |                       |                     | <0.001  |
| 0                                            | 235 (46.0%)           | 125 (24.9%)         |         |
| 1                                            | 161 (31.5%)           | 212 (42.2%)         |         |
| 2 or more                                    | 115 (22.5%)           | 165 (32.9%)         |         |
| Smoking status (n (%))*                      |                       |                     | 0.51    |
| Current                                      | 45 (17.2%)            | 42 (13.7%)          |         |
| Former                                       | 63 (24.0%)            | 79 (25.7%)          |         |
| Never                                        | 154 (58.8%)           | 186 (60.6%)         |         |
| Deprivation quintile (n (%)) <sup>1</sup> *  |                       |                     | 0.07    |
| 1                                            | 140 (27.7%)           | 108 (22.2%)         |         |
| 2                                            | 141 (27.9%)           | 150 (30.9%)         |         |
| 3                                            | 95 (18.8%)            | 107 (22.0%)         |         |
| 4                                            | 66 (13.1%)            | 74 (15.2%)          |         |
| 5                                            | 63 (12.5%)            | 47 (9.7%)           |         |
| Systolic blood pressure (mmHg; mean (SD))    | 122 (11.9)            | 122 (11.1)          | 0.79    |
| Diastolic blood pressure (mmHg) <sup>1</sup> | 75 (9.0)              | 75 (8.0)            | 0.98    |

\*missing data includes n=82 (8%) from ethnicity, n=444 (44%) from smoking and n=12 (1.2%) from deprivation quintile. Missing data is high from smoking as this was not a mandatory field on the electronic record until 2012; <sup>1</sup>deprivation quintile where 1 is the most and 5 the least deprived.



## Specialist clinic improves outcomes in maternal obesity

**Table 2: Maternal outcomes**

|                                            | Specialist<br>N=511 | Standard<br>N=502 | <i>P</i> value |
|--------------------------------------------|---------------------|-------------------|----------------|
| Pre-existing co-morbidities                |                     |                   |                |
| Type 2 diabetes (n; %)                     | 2 (0.4%)            | 12 (2.4%)         | 0.008          |
| Hypertensive complications                 |                     |                   |                |
|                                            |                     |                   | 0.27           |
| Chronic hypertension (n; %)                | 16 (1.6%)           | 11 (1.1%)         |                |
| Gestational hypertension (n; %)            | 18 (1.8%)           | 16 (1.6%)         |                |
| Pre-eclampsia (n; %)                       | 31 (3.1%)           | 25 (2.5%)         |                |
| Gestational diabetes*                      |                     |                   |                |
| Screening/diagnostic test performed (n; %) | 496 (100%)          | 356 (73.6%)       | <0.001         |
| Prevalence (n; %)                          | 129 (26.0%)         | 61 (12.5%)        | <0.001         |
| Labour and delivery                        |                     |                   |                |
| Onset labour (n; %)                        |                     |                   | 0.009          |
| No labour                                  | 111 (21.7%)         | 109 (21.7%)       |                |
| Spontaneous onset                          | 204 (39.9%)         | 243 (48.4%)       |                |
| Induction                                  | 196 (38.4%)         | 150 (29.9%)       |                |
| Delivery method (n; %)                     |                     |                   | <0.001         |
| Elective caesarean                         | 103 (20.2%)         | 89 (17.7%)        |                |
| Emergency caesarean                        | 122 (23.9%)         | 102 (20.3%)       |                |
| Instrumental                               | 56 (11.0%)          | 23 (4.6%)         |                |
| Spontaneous vertex                         | 229 (44.9%)         | 288 (57.4%)       |                |
| Blood loss at delivery (mls; mean (SD))    | 575 (464)           | 465 (387)         | <0.001         |
| Obstetric triage attendances (n; %)        |                     |                   |                |
|                                            |                     |                   | <0.001         |
| 0                                          | 108 (21.1%)         | 229 (45.6%)       |                |
| 1                                          | 132 (25.8%)         | 104 (20.7%)       |                |
| 2                                          | 93 (18.2%)          | 70 (13.9%)        |                |
| 3 or more                                  | 172 (33.7%)         | 93 (18.5%)        |                |

\*Denominator excludes women with pre-existing diabetes (type 1 or 2) or those who were not managed at the tertiary referral centre. In women who attended for specialist and standard care, the prevalence is based on blood glucose levels and not the clinical diagnosis recorded in the notes.

## Specialist clinic improves outcomes in maternal obesity

Table 3: Offspring outcomes

|                                     | Specialist<br>N=511 | Standard<br>N=502 | Significance<br>( <i>P</i> value) |
|-------------------------------------|---------------------|-------------------|-----------------------------------|
| Gender (n; %)                       |                     |                   | 0.34                              |
| Female                              | 238 (46.6%)         | 249 (49.6%)       |                                   |
| Male                                | 273 (53.4%)         | 253 (50.4%)       |                                   |
| Birthweight (g; mean (SD))          | 3576 (635)          | 3559 (664)        | 0.69                              |
| Macrosomia <sup>1</sup> (n; %)      | 31 (6.1%)           | 26 (5.2%)         | 0.54                              |
| Low birthweight <sup>2</sup> (n; %) | 21 (4.1%)           | 35 (7.0%)         | 0.04                              |
| Gestation (days; mean (SD))         | 277 (14.1)          | 277 (14.7)        | 0.82                              |
| Preterm birth <sup>3</sup> (n; %)   | 40 (7.8%)           | 39 (8.4%)         | 0.97                              |
| Outcome (n; %)                      |                     |                   |                                   |
| Livebirth                           | 510 (99.8%)         | 494 (98.4%)       | 0.02                              |
| Stillbirth                          | 1 (0.2%)            | 8 (1.6%)          |                                   |

<sup>1</sup>macrosomia defined as birthweight of 4000g or more; <sup>2</sup>low birthweight defined as birthweight of 2500g or lower;  
<sup>3</sup>preterm birth defined as birth before 259 days gestation.

## Specialist clinic improves outcomes in maternal obesity

1 468

2 469

3 470

4 471

**Table 4: Details of stillbirths**

| Case | Demographics |        |                          | Risk factors                             | Outcome                    | Birthweight centile <sup>1</sup>    | Cause                                |
|------|--------------|--------|--------------------------|------------------------------------------|----------------------------|-------------------------------------|--------------------------------------|
|      | Age (years)  | Parity | BMI (kg/m <sup>2</sup> ) |                                          |                            |                                     |                                      |
| ST1  | 31           | P2     | 42                       | Smoker, type 2 diabetes, RFM             | 33+5 weeks, male, 2050g    | 25 <sup>th</sup> – 50 <sup>th</sup> | Uncontrolled hypertension, abruption |
| ST2  | 32           | P1     | 42                       | No risk factors                          | 30+5 weeks, female, 700g,  | <3 <sup>rd</sup>                    | IUGR, placental insufficiency        |
| ST3  | 38           | P4     | 42                       | RFM                                      | 37 weeks, male, 2720g,     | 10 <sup>th</sup> – 25 <sup>th</sup> | Severe pre-eclampsia, abruption      |
| ST4  | 32           | P2     | 45                       | Smoker, RFM                              | 36 weeks, male, 2160g,     | 5 <sup>th</sup> – 10 <sup>th</sup>  | Acute intra-uterine hypoxia          |
| ST5  | 26           | P2     | 47                       | Smoker, RFM, isolated congenital anomaly | 35+5 weeks, female, 2155g, | 10 <sup>th</sup> – 25 <sup>th</sup> | Congenital anomaly                   |
| ST6  | 32           | P2     | 52                       | Smoker                                   | 30+5 weeks, female, 1620g, | 75 <sup>th</sup> – 90 <sup>th</sup> | Abruption                            |
| ST7  | 27           | P2     | 40                       | Type 2 diabetes, RFM                     | 38+2 weeks, male, 3370g,   | 50 <sup>th</sup> – 75 <sup>th</sup> | Poorly controlled diabetes           |
| ST8  | 21           | P0     | 40                       | Smoker                                   | 26+3 weeks, female, 750g,  | 25 <sup>th</sup> – 50 <sup>th</sup> | IUGR, placental insufficiency        |
| SD1  | 20           | P1     | 41                       | No risk factors                          | 39+5 weeks, male, 3725g,   | 50 <sup>th</sup> – 75 <sup>th</sup> | Unexplained                          |

472 Key: ST specialist, S standard, <sup>1</sup> birthweight centile defined by (Bonellie et al., 2008); BMI body mass index, RFM  
 473 reduced fetal movements, IUGR intrauterine growth restriction, placental insufficiency diagnosed by perinatal  
 474 pathologist

31 475

The RECORD statement – checklist of items, extended from the STROBE statement, that should be reported in observational studies using routinely collected health data.

|                           | Item No. | STROBE items                                                                                                                                                                               | Location in manuscript where items are reported | RECORD items                                                                                                                                                                                                                                                                                                                                                                                                                                | Location in manuscript where items are reported                     |
|---------------------------|----------|--------------------------------------------------------------------------------------------------------------------------------------------------------------------------------------------|-------------------------------------------------|---------------------------------------------------------------------------------------------------------------------------------------------------------------------------------------------------------------------------------------------------------------------------------------------------------------------------------------------------------------------------------------------------------------------------------------------|---------------------------------------------------------------------|
| <b>Title and abstract</b> |          |                                                                                                                                                                                            |                                                 |                                                                                                                                                                                                                                                                                                                                                                                                                                             |                                                                     |
|                           | 1        | (a) Indicate the study's design with a commonly used term in the title or the abstract (b) Provide in the abstract an informative and balanced summary of what was done and what was found | (a) Page 1<br>(b) Page 4-5                      | RECORD 1.1: The type of data used should be specified in the title or abstract. When possible, the name of the databases used should be included.<br><br>RECORD 1.2: If applicable, the geographic region and timeframe within which the study took place should be reported in the title or abstract.<br><br>RECORD 1.3: If linkage between databases was conducted for the study, this should be clearly stated in the title or abstract. | 1.1: Lines 52-53<br><br>1.2: Lines 57-58<br><br>1.3: Not applicable |
| <b>Introduction</b>       |          |                                                                                                                                                                                            |                                                 |                                                                                                                                                                                                                                                                                                                                                                                                                                             |                                                                     |
| Background rationale      | 2        | Explain the scientific background and rationale for the investigation being reported                                                                                                       | Page 6 & 7, lines 83 - 111                      |                                                                                                                                                                                                                                                                                                                                                                                                                                             |                                                                     |
| Objectives                | 3        | State specific objectives, including any prespecified hypotheses                                                                                                                           | Page 6 & 7, lines 106 - 111                     |                                                                                                                                                                                                                                                                                                                                                                                                                                             |                                                                     |
| <b>Methods</b>            |          |                                                                                                                                                                                            |                                                 |                                                                                                                                                                                                                                                                                                                                                                                                                                             |                                                                     |
| Study Design              | 4        | Present key elements of study design early in the paper                                                                                                                                    | Page 7 & 8, lines 117 - 155                     |                                                                                                                                                                                                                                                                                                                                                                                                                                             |                                                                     |
| Setting                   | 5        | Describe the setting, locations, and relevant dates, including periods of recruitment, exposure, follow-up, and data collection                                                            | Page 7, lines 117 - 124                         |                                                                                                                                                                                                                                                                                                                                                                                                                                             |                                                                     |
| Participants              | 6        | (a) <i>Cohort study</i> - Give the eligibility criteria, and the                                                                                                                           | (a) Page 7 & 8, lines 127 - 155                 | RECORD 6.1: The methods of study population selection (such as codes or                                                                                                                                                                                                                                                                                                                                                                     | 6.1: Lines 152 - 155                                                |

|                                                                                                                                           |                              |                                                                                                                                                                                                                                                                                                                                                                                                                                                                                                                                                                                                                                                             |                                                                                                                                                                                      |                                                                                                                                                                                                                                                                                                                                                                                                                                                                                                                                                                                                                              |                                                                                                                                                                                                                 |                             |
|-------------------------------------------------------------------------------------------------------------------------------------------|------------------------------|-------------------------------------------------------------------------------------------------------------------------------------------------------------------------------------------------------------------------------------------------------------------------------------------------------------------------------------------------------------------------------------------------------------------------------------------------------------------------------------------------------------------------------------------------------------------------------------------------------------------------------------------------------------|--------------------------------------------------------------------------------------------------------------------------------------------------------------------------------------|------------------------------------------------------------------------------------------------------------------------------------------------------------------------------------------------------------------------------------------------------------------------------------------------------------------------------------------------------------------------------------------------------------------------------------------------------------------------------------------------------------------------------------------------------------------------------------------------------------------------------|-----------------------------------------------------------------------------------------------------------------------------------------------------------------------------------------------------------------|-----------------------------|
| 1<br>2<br>3<br>4<br>5<br>6<br>7<br>8<br>9<br>10<br>11<br>12<br>13<br>14<br>15<br>16<br>17<br>18<br>19<br>20<br>21<br>22<br>23<br>24<br>25 |                              | <p>sources and methods of selection of participants. Describe methods of follow-up</p> <p><i>Case-control study</i> - Give the eligibility criteria, and the sources and methods of case ascertainment and control selection. Give the rationale for the choice of cases and controls</p> <p><i>Cross-sectional study</i> - Give the eligibility criteria, and the sources and methods of selection of participants</p> <p><i>(b) Cohort study</i> - For matched studies, give matching criteria and number of exposed and unexposed</p> <p><i>Case-control study</i> - For matched studies, give matching criteria and the number of controls per case</p> | (b) Page 8, lines 152 - 155                                                                                                                                                          | <p>algorithms used to identify subjects) should be listed in detail. If this is not possible, an explanation should be provided.</p> <p>RECORD 6.2: Any validation studies of the codes or algorithms used to select the population should be referenced. If validation was conducted for this study and not published elsewhere, detailed methods and results should be provided.</p> <p>RECORD 6.3: If the study involved linkage of databases, consider use of a flow diagram or other graphical display to demonstrate the data linkage process, including the number of individuals with linked data at each stage.</p> | <p>6.2: Not applicable</p> <p>6.3: Not applicable</p>                                                                                                                                                           |                             |
| 26<br>27<br>28<br>29<br>30<br>31<br>32                                                                                                    | Variables                    | 7                                                                                                                                                                                                                                                                                                                                                                                                                                                                                                                                                                                                                                                           | Clearly define all outcomes, exposures, predictors, potential confounders, and effect modifiers. Give diagnostic criteria, if applicable.                                            | Page 8 & 9: lines 158 - 189                                                                                                                                                                                                                                                                                                                                                                                                                                                                                                                                                                                                  | RECORD 7.1: A complete list of codes and algorithms used to classify exposures, outcomes, confounders, and effect modifiers should be provided. If these cannot be reported, an explanation should be provided. | Page 8 & 9: lines 158 - 189 |
| 33<br>34<br>35<br>36<br>37<br>38<br>39<br>40<br>41                                                                                        | Data sources/<br>measurement | 8                                                                                                                                                                                                                                                                                                                                                                                                                                                                                                                                                                                                                                                           | For each variable of interest, give sources of data and details of methods of assessment (measurement). Describe comparability of assessment methods if there is more than one group | Page 8 & 9: lines 158 - 189                                                                                                                                                                                                                                                                                                                                                                                                                                                                                                                                                                                                  |                                                                                                                                                                                                                 |                             |
| 42<br>43                                                                                                                                  | Bias                         | 9                                                                                                                                                                                                                                                                                                                                                                                                                                                                                                                                                                                                                                                           | Describe any efforts to address potential sources of bias                                                                                                                            | Page 9: lines 184 - 189                                                                                                                                                                                                                                                                                                                                                                                                                                                                                                                                                                                                      |                                                                                                                                                                                                                 |                             |
| 44<br>45                                                                                                                                  | Study size                   | 10                                                                                                                                                                                                                                                                                                                                                                                                                                                                                                                                                                                                                                                          | Explain how the study size was                                                                                                                                                       | Page 7: lines 117 -                                                                                                                                                                                                                                                                                                                                                                                                                                                                                                                                                                                                          |                                                                                                                                                                                                                 |                             |

46  
47  
48  
49

|                                                                                                                                            |                                  |            |                                                                                                                                                                                                                                                                                                                                                                                                                                                                                                                                                                      |                                                                                                                                                                                                                                                              |                                                                    |
|--------------------------------------------------------------------------------------------------------------------------------------------|----------------------------------|------------|----------------------------------------------------------------------------------------------------------------------------------------------------------------------------------------------------------------------------------------------------------------------------------------------------------------------------------------------------------------------------------------------------------------------------------------------------------------------------------------------------------------------------------------------------------------------|--------------------------------------------------------------------------------------------------------------------------------------------------------------------------------------------------------------------------------------------------------------|--------------------------------------------------------------------|
|                                                                                                                                            |                                  | arrived at | 121                                                                                                                                                                                                                                                                                                                                                                                                                                                                                                                                                                  |                                                                                                                                                                                                                                                              |                                                                    |
| 1<br>2<br>3<br>4<br>5<br>6<br>7                                                                                                            | Quantitative variables           | 11         | Explain how quantitative variables were handled in the analyses. If applicable, describe which groupings were chosen, and why                                                                                                                                                                                                                                                                                                                                                                                                                                        | Page 8 & 9: lines 158 - 189                                                                                                                                                                                                                                  |                                                                    |
| 8<br>9<br>10<br>11<br>12<br>13<br>14<br>15<br>16<br>17<br>18<br>19<br>20<br>21<br>22<br>23<br>24<br>25<br>26<br>27<br>28<br>29<br>30<br>31 | Statistical methods              | 12         | (a) Describe all statistical methods, including those used to control for confounding<br>(b) Describe any methods used to examine subgroups and interactions<br>(c) Explain how missing data were addressed<br>(d) <i>Cohort study</i> - If applicable, explain how loss to follow-up was addressed<br><i>Case-control study</i> - If applicable, explain how matching of cases and controls was addressed<br><i>Cross-sectional study</i> - If applicable, describe analytical methods taking account of sampling strategy<br>(e) Describe any sensitivity analyses | (a) – (e) Page 10: lines 191 - 196                                                                                                                                                                                                                           |                                                                    |
| 32<br>33<br>34<br>35<br>36<br>37<br>38<br>39<br>40<br>41<br>42                                                                             | Data access and cleaning methods |            | ..                                                                                                                                                                                                                                                                                                                                                                                                                                                                                                                                                                   | RECORD 12.1: Authors should describe the extent to which the investigators had access to the database population used to create the study population.<br><br>RECORD 12.2: Authors should provide information on the data cleaning methods used in the study. | 12.1: Page 9, lines 184 – 189<br><br>12.2: Page 9, lines 184 - 189 |
| 43<br>44<br>45                                                                                                                             | Linkage                          |            | ..                                                                                                                                                                                                                                                                                                                                                                                                                                                                                                                                                                   | RECORD 12.3: State whether the study included person-level, institutional-                                                                                                                                                                                   | 12.3: Not applicable                                               |

|                  |    |                                                                                                                                                                                                                                                                                                                                                 |                                                                              |                                                                                                                                                                                                                                                                                                                    |                                                      |
|------------------|----|-------------------------------------------------------------------------------------------------------------------------------------------------------------------------------------------------------------------------------------------------------------------------------------------------------------------------------------------------|------------------------------------------------------------------------------|--------------------------------------------------------------------------------------------------------------------------------------------------------------------------------------------------------------------------------------------------------------------------------------------------------------------|------------------------------------------------------|
|                  |    |                                                                                                                                                                                                                                                                                                                                                 |                                                                              | level, or other data linkage across two or more databases. The methods of linkage and methods of linkage quality evaluation should be provided.                                                                                                                                                                    |                                                      |
| <b>Results</b>   |    |                                                                                                                                                                                                                                                                                                                                                 |                                                                              |                                                                                                                                                                                                                                                                                                                    |                                                      |
| Participants     | 13 | (a) Report the numbers of individuals at each stage of the study ( <i>e.g.</i> , numbers potentially eligible, examined for eligibility, confirmed eligible, included in the study, completing follow-up, and analysed)<br>(b) Give reasons for non-participation at each stage.<br>(c) Consider use of a flow diagram                          | (a - b) Page 6: lines 121 – 124 and page 10: lines 200<br>(c) Not applicable | RECORD 13.1: Describe in detail the selection of the persons included in the study ( <i>i.e.</i> , study population selection) including filtering based on data quality, data availability and linkage. The selection of included persons can be described in the text and/or by means of the study flow diagram. | 13.1: Page 6: lines 121 – 124 and page 10: lines 200 |
| Descriptive data | 14 | (a) Give characteristics of study participants ( <i>e.g.</i> , demographic, clinical, social) and information on exposures and potential confounders<br>(b) Indicate the number of participants with missing data for each variable of interest<br>(c) <i>Cohort study</i> - summarise follow-up time ( <i>e.g.</i> , average and total amount) | (a) Page 9: lines 199 – 203<br>(b) Table 1<br>(c) Not applicable             |                                                                                                                                                                                                                                                                                                                    |                                                      |
| Outcome data     | 15 | <i>Cohort study</i> - Report numbers of outcome events or summary measures over time<br><i>Case-control study</i> - Report numbers in each exposure category, or summary measures of exposure<br><i>Cross-sectional study</i> - Report numbers of outcome events or summary measures                                                            | Page 9 & 10, lines 205 – 235 and Tables 1 - 4                                |                                                                                                                                                                                                                                                                                                                    |                                                      |
| Main results     | 16 | (a) Give unadjusted estimates                                                                                                                                                                                                                                                                                                                   | (a – c): Main results                                                        |                                                                                                                                                                                                                                                                                                                    |                                                      |

|                                                                               |                  |                                                                                                                                                                                                                                                                                                                                                                                   |                                                                                                                                                                            |                          |                                                                                                                                                                                                                                                                                                          |
|-------------------------------------------------------------------------------|------------------|-----------------------------------------------------------------------------------------------------------------------------------------------------------------------------------------------------------------------------------------------------------------------------------------------------------------------------------------------------------------------------------|----------------------------------------------------------------------------------------------------------------------------------------------------------------------------|--------------------------|----------------------------------------------------------------------------------------------------------------------------------------------------------------------------------------------------------------------------------------------------------------------------------------------------------|
| 1<br>2<br>3<br>4<br>5<br>6<br>7<br>8<br>9<br>10<br>11<br>12<br>13<br>14<br>15 |                  | and, if applicable, confounder-adjusted estimates and their precision (e.g., 95% confidence interval). Make clear which confounders were adjusted for and why they were included<br>(b) Report category boundaries when continuous variables were categorized<br>(c) If relevant, consider translating estimates of relative risk into absolute risk for a meaningful time period | section                                                                                                                                                                    |                          |                                                                                                                                                                                                                                                                                                          |
| 16<br>17<br>18<br>19                                                          | Other analyses   | 17                                                                                                                                                                                                                                                                                                                                                                                | Report other analyses done—e.g., analyses of subgroups and interactions, and sensitivity analyses                                                                          | Not applicable           |                                                                                                                                                                                                                                                                                                          |
| <b>Discussion</b>                                                             |                  |                                                                                                                                                                                                                                                                                                                                                                                   |                                                                                                                                                                            |                          |                                                                                                                                                                                                                                                                                                          |
| 22<br>23                                                                      | Key results      | 18                                                                                                                                                                                                                                                                                                                                                                                | Summarise key results with reference to study objectives                                                                                                                   | Page 11: lines 238 - 242 |                                                                                                                                                                                                                                                                                                          |
| 24<br>25<br>26<br>27<br>28<br>29<br>30<br>31<br>32                            | Limitations      | 19                                                                                                                                                                                                                                                                                                                                                                                | Discuss limitations of the study, taking into account sources of potential bias or imprecision. Discuss both direction and magnitude of any potential bias                 | Page 12: Lines 269 - 281 | RECORD 19.1: Discuss the implications of using data that were not created or collected to answer the specific research question(s). Include discussion of misclassification bias, unmeasured confounding, missing data, and changing eligibility over time, as they pertain to the study being reported. |
| 34<br>35<br>36<br>37<br>38<br>39<br>40<br>41                                  | Interpretation   | 20                                                                                                                                                                                                                                                                                                                                                                                | Give a cautious overall interpretation of results considering objectives, limitations, multiplicity of analyses, results from similar studies, and other relevant evidence | Page 12: Lines 283 - 298 |                                                                                                                                                                                                                                                                                                          |
| 42<br>43<br>44<br>45                                                          | Generalisability | 21                                                                                                                                                                                                                                                                                                                                                                                | Discuss the generalisability (external validity) of the study results                                                                                                      | Page 14: lines 300 - 313 |                                                                                                                                                                                                                                                                                                          |



| Other Information                                         |    |                                                                                                                                                               |                    |                                                                                                                                                          |      |
|-----------------------------------------------------------|----|---------------------------------------------------------------------------------------------------------------------------------------------------------------|--------------------|----------------------------------------------------------------------------------------------------------------------------------------------------------|------|
| Funding                                                   | 22 | Give the source of funding and the role of the funders for the present study and, if applicable, for the original study on which the present article is based | Page 15: lines 338 |                                                                                                                                                          |      |
| Accessibility of protocol, raw data, and programming code |    | ..                                                                                                                                                            |                    | RECORD 22.1: Authors should provide information on how to access any supplemental information such as the study protocol, raw data, or programming code. | 22.1 |

\*Reference: Benchimol EI, Smeeth L, Guttman A, Harron K, Moher D, Petersen I, Sørensen HT, von Elm E, Langan SM, the RECORD Working Committee. The REporting of studies Conducted using Observational Routinely-collected health Data (RECORD) Statement. *PLoS Medicine* 2015; in press.

\*Checklist is protected under Creative Commons Attribution ([CC BY](https://creativecommons.org/licenses/by/4.0/)) license.
